# Supplementary material
Source: PubMed Central journal article supplement (PMC6651762)
Supplement: DS_10.1177_0022034519860449.pdf [file DS_10.1177_0022034519860449.pdf]

## **The Subgingival Microbiome Relationship to Periodontitis in Older Women**

R.J. Genco, M.J. LaMonte, D.I. McSkimming, M.J. Buck, L. Li, K.M. Hovey, C.A. Andrews, Y. Sun, M. Tsompana, W. Zheng, H.R. Banack, V. Murugaiyan, and J. Wactawski-Wende

### **APPENDIX**

#### **1. Details on Study Methods**

**2. Appendix Table 1.** CLR mean OTUs for the 211 taxa identified that did not differ significantly with periodontal disease categories following correction for multiple testing, and linear correlations for CLR mean OTUs with pocket depth and clinical attachment level.

**3. Appendix Table 2.** Prevalence (% present at any abundance) of the 267 identified taxa according to periodontal disease categories.

#### **Details on Study Methods**

##### **Oral Examination and Subgingival Plaque Collection**

Whole mouth oral examinations were conducted by trained and calibrated dental hygienists (LaMonte et al., 2013; Banack et al., 2018;). Probing pocket depth (PD) was defined as the distance in millimeters from the gingival margin (GM) to the base of the gingival sulcus measured using a constant force (20 g) electronic probe on six surfaces per tooth (distobuccal, midbuccal, mesiobuccal, distolingual, midlingual and mesiolingual) in all the teeth present except for third molars. A Michigan O periodontal probe was used to measure the distance from the cement-enamel junction (CEJ) to the GM at the same six sites per tooth listed above. Clinical attachment loss (CAL) was calculated according to the following formulae:  $CAL = PD - (GM -$

CEJ) if the GM was coronal to the CEJ; or,  $CAL = PD + (GM - CEJ)$  if the GM was apical to the CEJ. Gingival bleeding (absent or present) was assessed at three sites per tooth using the Michigan O probe. Reproducibility of these measurements has been published (LaMonte et al., 2018). Subgingival plaque samples were obtained using the paper points method (Brennan et al., 2007). Fine paper points were placed in the gingival pockets of up to 12 pre-specified teeth (6 maxillary and 6 mandibular teeth) for 10 seconds. The paper point were placed into 4 mL lactated Ringer's solution, which was vortexed and then aliquoted into 0.5 mL cryovials and frozen immediately at  $-80^{\circ}\text{C}$ .

### **Subgingival Plaque DNA Isolation and Purification**

Genomic DNA was isolated using the QIASymphony SP automated system and the QIASymphony DSP Virus/Pathogen Mini Kit (Qiagen, Valencia, CA) according to the Complex200\_V6\_DSP protocol. Samples were isolated in batches of 85 to 88 patient samples with positive (mock DNA, subgingival plaque pools) and negative (PCR grade water, extraction buffer) controls. All procedures were carried out in a disinfected biosafety cabinet, using Gilson DNA-free tips (Gilson, Inc., Middleton, WI) and disinfected pipettes. Briefly, 500  $\mu\text{l}$  of oral plaque sample, derived from the combination of one upper and one lower arch aliquot from each subject was transferred to a 2 ml Sarstedt tube. Bacteria were pelleted by centrifugation at  $5000\times g$  for 10 min, resuspended in a 300  $\mu\text{l}$  lysis solution (20 mg/ml lysozyme in 20 mM Tris-HCl, pH 8.0; 2 mM EDTA; 1.2% Triton X-100) and incubated at  $37^{\circ}\text{C}$  for 30 min. Following incubation, tubes were briefly centrifuged and DNA extraction and purification was done according to the Qiasymphony DSP Virus /Pathogen Kit Instructions. Carrier RNA-AVE mixture was added to all samples to increase recovery of nucleic acids. After DNA purification, samples were eluted in a barcoded 96 well elution plate. DNA extracted material was quantified

with the Quant-iT PicoGreen ds DNA Assay Kit (Invitrogen), with most samples yielding average concentrations between 0.3-2 ng/ $\mu$ l.

### **Subgingival Microbiome Analysis**

Details on the procedures used to characterize the microbiome of subgingival plaque samples have been published (Banack et al., 2018). Briefly, metagenomic DNA was amplified using the 16S V3 (341F) forward and V4 (805R) reverse primer pairs with added Illumina adapter overhang nucleotide sequences. PCR amplifications and sequencing were performed on 96 samples at a time with both positive (mock DNA, subgingival plaque pools) and negative (PCR grade water, extraction buffer) controls. Samples were multiplexed and 300 bp pair-end sequenced on an Illumina MiSeq. The paired-end reads were joined with PEAR version 0.9.6. The percentage of joined-reads was recorded as the “Merge Rate”. Then, sequence quality filtering was performed using Fastx-Toolkit to identify reads with 90% of their bases having a score higher than Q30. Reads that did not meet this criterion were removed and the percentage of the remaining reads was recorded as the “Pass Rate”. After the primer was removed, sequences were clustered at 97% identity against the Human Oral Microbiome Database (HOMD) version 14.5 (Chen et al., 2010) with BLAST (Altschul et al., 1990) aiming at the species level. Sequences that failed to match the database were discarded. We obtained a total of 773 OTUs with a number of reads ranging from 17 to 4,347,294 per sample. As a preprocessing step, we require a “Merge Rate”  $\geq 90\%$ , “Pass Rate”  $\geq 60\%$ , and “Hit Count” per sample  $\geq 3,000$ . Samples failing to meet the criterion were removed from downstream analysis, leaving 267 taxa for analysis. We filtered the raw OTU table by discarding those with a frequency  $< 0.02\%$  of the total read count. In order to sequence 1200 samples, batches of 85-88 samples were processed

together, randomly arranged on the 96 well plates with negative and positive quality control samples and standardized procedures were applied to minimize batch effects.

## **REFERENCES**

- Altschul SF, Gish W, Miller W, Myers EW, Lipman DJ. 1990. Basic local alignment search tool. *J Mol Biol.* 215(3):403-410.
- Banack HR, Genco RJ, LaMonte MJ, Millen AE, Buck MJ, Sun Y, Andrews CA, Hovey KM, Tsompana M, McSkimming DI et al. 2018. Cohort profile: The buffalo osteoperio microbiome prospective cohort study. *BMJ Open.* 8(12):e024263.
- Brennan RM, Genco RJ, Wilding GE, Hovey KM, Trevisan M, Wactawski-Wende J. 2007. Bacterial species in subgingival plaque and oral bone loss in postmenopausal women. *Journal of Periodontology.* 78(6):1051-1061.
- Chen T, Yu WH, Izard J, Baranova OV, Lakshmanan A, Dewhirst FE. 2010. The human oral microbiome database: A web accessible resource for investigating oral microbe taxonomic and genomic information. *Database (Oxford).* 2010:baq013.
- LaMonte MJ, Hovey KM, Genco RJ, Millen AE, Trevisan M, Wactawski-Wende J. 2013. Five-year changes in periodontal disease measures among postmenopausal females: The Buffalo Osteoperio Study. *Journal of Periodontology.* 84(5):572-584.

**Appendix Table 1.** CLR mean OTUs for the 211 taxa identified that did not differ significantly with periodontal disease categories following correction for multiple testing, and linear correlations for CLR mean OTUs with pocket depth and clinical attachment level.

| OTU label                                             | Periodontal Disease Category* |                      |                     |                   |         |      | Whole Mouth Mean |                |         |                |         |       |
|-------------------------------------------------------|-------------------------------|----------------------|---------------------|-------------------|---------|------|------------------|----------------|---------|----------------|---------|-------|
|                                                       | Overall<br>(N = 1206)         | None/Mild<br>(n=303) | Moderate<br>(n=703) | Severe<br>(n=200) | p-value |      | PPD              |                |         | CAL            |         |       |
|                                                       |                               | Mean (SE)            | Mean (SE)           | Mean (SE)         |         |      | Mean (SE)        | r <sup>†</sup> | p-value | r <sup>†</sup> | p-value |       |
|                                                       |                               |                      |                     |                   | †       | ‡    | †                | ‡              | †       | ‡              |         |       |
| Alloprevotella tannerae                               | 2.68 (0.12)                   | 2.19 (0.22)          | 2.62 (0.15)         | 3.65 (0.28)       | <.001   | 0.08 | 0.189            | <.001          | <.001   | 0.046          | 0.11    | 1.00  |
| Bacteroidetes_[G-5] HMT 511                           | -1.48 (0.09)                  | -1.80 (0.15)         | -1.56 (0.12)        | -0.71 (0.26)      | <.001   | 0.09 | 0.136            | <.001          | <.001   | 0.067          | 0.02    | 1.00  |
| Bacteroidales_[G-2] HMT 274                           | 2.95 (0.10)                   | 2.42 (0.19)          | 3.03 (0.13)         | 3.50 (0.23)       | 0.001   | 0.31 | 0.135            | <.001          | <.001   | 0.066          | 0.02    | 1.00  |
| Alloprevotella rava                                   | -0.69 (0.08)                  | -1.06 (0.15)         | -0.70 (0.11)        | -0.10 (0.22)      | 0.001   | 0.33 | 0.178            | <.001          | <.001   | 0.061          | 0.04    | 1.00  |
| Prevotella HMT 300                                    | 1.42 (0.09)                   | 1.02 (0.17)          | 1.45 (0.11)         | 1.95 (0.20)       | 0.003   | 0.69 | 0.090            | 0.002          | 0.48    | 0.046          | 0.11    | 1.00  |
| Dialister invisus                                     | 3.51 (0.08)                   | 3.13 (0.16)          | 3.53 (0.10)         | 4.03 (0.17)       | <.001   | 0.21 | 0.121            | <.001          | 0.007   | 0.063          | 0.03    | 1.00  |
| Prevotella denticola                                  | 1.73 (0.10)                   | 1.61 (0.20)          | 1.59 (0.14)         | 2.44 (0.26)       | 0.011   | 1.00 | 0.092            | 0.001          | 0.35    | 0.050          | 0.08    | 1.00  |
| Prevotella HMT 317                                    | 2.73 (0.10)                   | 2.42 (0.20)          | 2.71 (0.14)         | 3.25 (0.24)       | 0.04    | 1.00 | 0.094            | 0.001          | 0.30    | 0.035          | 0.22    | 1.00  |
| Fusobacterium nucleatum_subsp._nucleatum              | -0.24 (0.08)                  | -0.52 (0.13)         | -0.28 (0.10)        | 0.30 (0.23)       | 0.004   | 0.99 | 0.036            | 0.22           | 1.00    | 0.080          | 0.006   | 1.00  |
| Selenomonas sputigena                                 | 5.61 (0.08)                   | 5.30 (0.17)          | 5.62 (0.10)         | 6.08 (0.18)       | 0.009   | 1.00 | 0.098            | <.001          | 0.19    | 0.002          | 0.94    | 1.00  |
| Catonella morbi                                       | 1.85 (0.08)                   | 1.57 (0.15)          | 1.83 (0.10)         | 2.34 (0.18)       | 0.006   | 1.00 | 0.168            | <.001          | <.001   | 0.059          | 0.04    | 1.00  |
| Olsenella HMT 807                                     | -0.50 (0.07)                  | -0.83 (0.13)         | -0.49 (0.09)        | -0.06 (0.18)      | 0.002   | 0.55 | 0.100            | <.001          | 0.13    | 0.067          | 0.02    | 1.00  |
| TM7_[G-1] HMT 346                                     | 3.78 (0.09)                   | 3.42 (0.18)          | 3.82 (0.11)         | 4.17 (0.19)       | 0.021   | 1.00 | 0.121            | <.001          | 0.006   | 0.018          | 0.54    | 1.00  |
| Peptostreptococcus stomatis                           | -0.81 (0.09)                  | -0.97 (0.16)         | -0.91 (0.11)        | -0.24 (0.23)      | 0.010   | 1.00 | 0.168            | <.001          | <.001   | 0.037          | 0.20    | 1.00  |
| Selenomonas HMT 126                                   | -0.61 (0.08)                  | -0.87 (0.15)         | -0.62 (0.11)        | -0.18 (0.21)      | 0.03    | 1.00 | 0.129            | <.001          | 0.002   | 0.035          | 0.23    | 1.00  |
| Treponema HMT 231                                     | -1.16 (0.09)                  | -1.45 (0.15)         | -1.14 (0.12)        | -0.77 (0.25)      | 0.05    | 1.00 | 0.077            | 0.008          | 1.00    | 0.002          | 0.94    | 1.00  |
| Campylobacter showae                                  | 2.89 (0.08)                   | 2.54 (0.15)          | 2.94 (0.10)         | 3.23 (0.20)       | 0.02    | 1.00 | 0.070            | 0.02           | 1.00    | 0.019          | 0.52    | 1.00  |
| Treponema HMT 237                                     | -2.21 (0.08)                  | -2.40 (0.13)         | -2.27 (0.11)        | -1.72 (0.24)      | 0.02    | 1.00 | 0.108            | <.001          | 0.05    | 0.061          | 0.03    | 1.00  |
| Prevotella buccae                                     | -1.25 (0.07)                  | -1.40 (0.13)         | -1.31 (0.09)        | -0.77 (0.20)      | 0.01    | 1.00 | 0.094            | 0.001          | 0.29    | 0.018          | 0.54    | 1.00  |
| Mycoplasma salivarium                                 | -1.78 (0.07)                  | -2.06 (0.12)         | -1.76 (0.10)        | -1.43 (0.19)      | 0.02    | 1.00 | 0.076            | 0.008          | 1.00    | 0.042          | 0.15    | 1.00  |
| Prevotella HMT 376                                    | -2.55 (0.07)                  | -2.70 (0.12)         | -2.61 (0.09)        | -2.09 (0.22)      | 0.02    | 1.00 | 0.099            | <.001          | 0.15    | 0.033          | 0.25    | 1.00  |
| Tannerella HMT 808                                    | -1.76 (0.07)                  | -1.88 (0.12)         | -1.83 (0.09)        | -1.30 (0.19)      | 0.01    | 1.00 | 0.084            | 0.003          | 0.91    | 0.044          | 0.13    | 1.00  |
| Johnsonella ignava                                    | -0.42 (0.09)                  | -0.57 (0.18)         | -0.47 (0.12)        | 0.01 (0.23)       | 0.11    | 1.00 | 0.068            | 0.02           | 1.00    | 0.052          | 0.07    | 1.00  |
| Oribacterium HMT 078                                  | 0.65 (0.08)                   | 0.42 (0.16)          | 0.66 (0.10)         | 1.00 (0.19)       | 0.08    | 1.00 | 0.064            | 0.03           | 1.00    | 0.039          | 0.17    | 1.00  |
| Peptostreptococcaceae_[XI][G-9]<br>[Eubacterium]_brac | 1.70 (0.08)                   | 1.42 (0.15)          | 1.74 (0.11)         | 1.97 (0.20)       | 0.09    | 1.00 | 0.111            | <.001          | 0.031   | 0.034          | 0.24    | 1.00  |
| Actinomyces israelii                                  | -0.46 (0.06)                  | -0.83 (0.12)         | -0.35 (0.08)        | -0.29 (0.13)      | 0.002   | 0.53 | 0.011            | 0.70           | 1.00    | 0.119          | <.001   | 0.009 |
| Selenomonas HMT 919                                   | 0.47 (0.08)                   | 0.24 (0.16)          | 0.48 (0.11)         | 0.78 (0.22)       | 0.13    | 1.00 | 0.111            | <.001          | 0.031   | -0.009         | 0.75    | 1.00  |
| Selenomonas infelix                                   | 1.47 (0.08)                   | 1.16 (0.17)          | 1.53 (0.11)         | 1.70 (0.19)       | 0.09    | 1.00 | 0.072            | 0.01           | 1.00    | -0.015         | 0.61    | 1.00  |

| OTU label                                          | Periodontal Disease Category* |                      |                     |                   |         |      | Whole Mouth Mean |           |           |           |                |         |
|----------------------------------------------------|-------------------------------|----------------------|---------------------|-------------------|---------|------|------------------|-----------|-----------|-----------|----------------|---------|
|                                                    | Overall<br>(N = 1206)         | None/Mild<br>(n=303) | Moderate<br>(n=703) | Severe<br>(n=200) | p-value |      | PPD              |           |           | CAL       |                |         |
|                                                    |                               |                      |                     |                   |         |      | Mean (SE)        | Mean (SE) | Mean (SE) | Mean (SE) | r <sup>†</sup> | p-value |
|                                                    | †                             | ‡                    | †                   | ‡                 | †       | ‡    |                  |           |           |           |                |         |
| Fusobacterium nucleatum_subsp._animalis            | 5.38 (0.07)                   | 5.18 (0.14)          | 5.38 (0.09)         | 5.71 (0.14)       | 0.04    | 1.00 | 0.067            | 0.02      | 1.00      | 0.021     | 0.48           | 1.00    |
| Centipeda periodontii                              | -0.62 (0.08)                  | -0.94 (0.14)         | -0.54 (0.10)        | -0.42 (0.20)      | 0.04    | 1.00 | 0.068            | 0.019     | 1.00      | 0.028     | 0.32           | 1.00    |
| Selenomonas diana                                  | -2.37 (0.07)                  | -2.48 (0.12)         | -2.44 (0.08)        | -1.98 (0.20)      | 0.03    | 1.00 | 0.094            | 0.001     | 0.29      | 0.037     | 0.20           | 1.00    |
| Veillonellaceae_[G-1] HMT 129                      | -1.72 (0.08)                  | -1.80 (0.15)         | -1.80 (0.10)        | -1.30 (0.21)      | 0.05    | 1.00 | 0.076            | 0.008     | 1.00      | 0.037     | 0.20           | 1.00    |
| Prevotella maculosa                                | 1.42 (0.08)                   | 1.27 (0.16)          | 1.38 (0.10)         | 1.77 (0.17)       | 0.10    | 1.00 | 0.081            | 0.005     | 1.00      | 0.005     | 0.87           | 1.00    |
| Fusobacterium HMT 203                              | 4.25 (0.10)                   | 3.95 (0.20)          | 4.34 (0.13)         | 4.38 (0.24)       | 0.24    | 1.00 | 0.071            | 0.013     | 1.00      | 0.065     | 0.02           | 1.00    |
| Peptostreptococcaceae_[XI][G-1] [Eubacterium]_infi | -1.35 (0.07)                  | -1.40 (0.13)         | -1.43 (0.09)        | -1.00 (0.18)      | 0.07    | 1.00 | 0.121            | <.001     | 0.007     | 0.025     | 0.40           | 1.00    |
| Atopobium rimae                                    | 0.21 (0.09)                   | 0.27 (0.18)          | 0.06 (0.12)         | 0.64 (0.23)       | 0.07    | 1.00 | 0.077            | 0.007     | 1.00      | 0.026     | 0.37           | 1.00    |
| Prevotella HMT 292                                 | -1.07 (0.08)                  | -1.10 (0.16)         | -1.13 (0.11)        | -0.79 (0.21)      | 0.33    | 1.00 | 0.026            | 0.37      | 1.00      | 0.035     | 0.23           | 1.00    |
| Selenomonas HMT 442                                | -2.60 (0.05)                  | -2.64 (0.09)         | -2.64 (0.07)        | -2.35 (0.16)      | 0.13    | 1.00 | 0.089            | 0.002     | 0.55      | 0.048     | 0.09           | 1.00    |
| Treponema lecithinolyticum                         | -2.01 (0.08)                  | -2.14 (0.13)         | -2.01 (0.11)        | -1.85 (0.22)      | 0.52    | 1.00 | 0.057            | 0.046     | 1.00      | 0.029     | 0.31           | 1.00    |
| Treponema medium                                   | -2.79 (0.06)                  | -2.93 (0.09)         | -2.76 (0.09)        | -2.66 (0.19)      | 0.34    | 1.00 | 0.082            | 0.004     | 1.00      | 0.052     | 0.07           | 1.00    |
| Tannerella HMT 286                                 | 0.10 (0.07)                   | -0.19 (0.14)         | 0.22 (0.10)         | 0.08 (0.18)       | 0.06    | 1.00 | -0.008           | 0.77      | 1.00      | -0.013    | 0.65           | 1.00    |
| Veillonellaceae_[G-1] HMT 155                      | 0.99 (0.09)                   | 0.94 (0.18)          | 0.95 (0.12)         | 1.19 (0.21)       | 0.61    | 1.00 | 0.021            | 0.47      | 1.00      | 0.000     | 0.99           | 1.00    |
| Prevotella HMT 314                                 | -2.28 (0.07)                  | -2.16 (0.14)         | -2.44 (0.09)        | -1.91 (0.23)      | 0.023   | 1.00 | 0.021            | 0.46      | 1.00      | 0.038     | 0.19           | 1.00    |
| Prevotella nigrescens                              | 4.31 (0.10)                   | 4.38 (0.20)          | 4.19 (0.14)         | 4.62 (0.23)       | 0.30    | 1.00 | 0.143            | <.001     | <.001     | 0.012     | 0.67           | 1.00    |
| Prevotella pleuritidis                             | -0.11 (0.12)                  | -0.20 (0.23)         | -0.12 (0.16)        | 0.03 (0.32)       | 0.83    | 1.00 | 0.126            | <.001     | 0.003     | 0.012     | 0.67           | 1.00    |
| Butyrivibrio HMT 080                               | -2.97 (0.06)                  | -3.09 (0.09)         | -2.93 (0.08)        | -2.90 (0.17)      | 0.48    | 1.00 | 0.002            | 0.94      | 1.00      | 0.042     | 0.15           | 1.00    |
| Stomatobaculum longum                              | -0.71 (0.07)                  | -0.77 (0.15)         | -0.72 (0.10)        | -0.59 (0.18)      | 0.74    | 1.00 | 0.012            | 0.67      | 1.00      | 0.059     | 0.04           | 1.00    |
| Capnocytophaga HMT 336                             | 0.69 (0.09)                   | 0.70 (0.18)          | 0.64 (0.12)         | 0.86 (0.22)       | 0.69    | 1.00 | 0.036            | 0.21      | 1.00      | -0.000    | 0.99           | 1.00    |
| Prevotella multiformis                             | -3.09 (0.06)                  | -3.10 (0.09)         | -3.12 (0.08)        | -2.98 (0.18)      | 0.69    | 1.00 | 0.003            | 0.91      | 1.00      | 0.014     | 0.62           | 1.00    |
| Treponema vincentii                                | -2.68 (0.06)                  | -2.80 (0.09)         | -2.62 (0.08)        | -2.69 (0.16)      | 0.45    | 1.00 | 0.026            | 0.37      | 1.00      | -0.005    | 0.86           | 1.00    |
| Leptotrichia buccalis                              | 0.47 (0.10)                   | 0.22 (0.19)          | 0.61 (0.13)         | 0.33 (0.23)       | 0.22    | 1.00 | 0.018            | 0.53      | 1.00      | 0.004     | 0.88           | 1.00    |
| Prevotella oulorum                                 | 1.20 (0.09)                   | 1.05 (0.19)          | 1.28 (0.11)         | 1.15 (0.21)       | 0.52    | 1.00 | 0.001            | 0.96      | 1.00      | -0.002    | 0.96           | 1.00    |
| Capnocytophaga HMT 338                             | -1.07 (0.09)                  | -1.07 (0.17)         | -1.09 (0.12)        | -0.98 (0.23)      | 0.90    | 1.00 | 0.005            | 0.86      | 1.00      | -0.008    | 0.78           | 1.00    |
| Selenomonas HMT 133                                | -2.37 (0.08)                  | -2.40 (0.15)         | -2.36 (0.10)        | -2.34 (0.21)      | 0.96    | 1.00 | -0.045           | 0.12      | 1.00      | -0.012    | 0.68           | 1.00    |
| Selenomonas HMT 146                                | 0.03 (0.08)                   | -0.01 (0.16)         | 0.04 (0.11)         | 0.04 (0.20)       | 0.97    | 1.00 | 0.096            | <.001     | 0.23      | -0.019    | 0.52           | 1.00    |
| Bifidobacterium dentium                            | -1.86 (0.08)                  | -1.74 (0.17)         | -1.97 (0.11)        | -1.69 (0.23)      | 0.34    | 1.00 | -0.016           | 0.58      | 1.00      | 0.047     | 0.100          | 1.00    |
| Shuttleworthia satelles                            | -2.09 (0.07)                  | -2.00 (0.13)         | -2.17 (0.09)        | -1.95 (0.20)      | 0.38    | 1.00 | -0.004           | 0.90      | 1.00      | -0.032    | 0.26           | 1.00    |
| Streptococcus anginosus                            | 1.15 (0.11)                   | 1.26 (0.21)          | 1.07 (0.14)         | 1.30 (0.26)       | 0.63    | 1.00 | 0.055            | 0.06      | 1.00      | 0.006     | 0.83           | 1.00    |
| Selenomonas HMT 936                                | -0.97 (0.08)                  | -1.20 (0.15)         | -0.82 (0.11)        | -1.16 (0.19)      | 0.08    | 1.00 | 0.041            | 0.16      | 1.00      | 0.038     | 0.18           | 1.00    |
| Prevotella oris                                    | 5.08 (0.09)                   | 5.13 (0.17)          | 5.04 (0.12)         | 5.16 (0.22)       | 0.84    | 1.00 | 0.044            | 0.12      | 1.00      | -0.017    | 0.56           | 1.00    |
| Actinobaculum HMT 848                              | -0.70 (0.08)                  | -0.84 (0.16)         | -0.60 (0.10)        | -0.82 (0.19)      | 0.33    | 1.00 | 0.000            | 0.99      | 1.00      | 0.000     | 0.99           | 1.00    |

| OTU label                                             | Periodontal Disease Category* |                      |                     |                   |         |      | Whole Mouth Mean |         |       |                |         |      |
|-------------------------------------------------------|-------------------------------|----------------------|---------------------|-------------------|---------|------|------------------|---------|-------|----------------|---------|------|
|                                                       | Overall<br>(N = 1206)         | None/Mild<br>(n=303) | Moderate<br>(n=703) | Severe<br>(n=200) | p-value |      | PPD              |         |       | CAL            |         |      |
|                                                       | Mean (SE)                     | Mean (SE)            | Mean<br>(SE)        | Mean<br>(SE)      | †       | ‡    | r <sup>†</sup>   | p-value |       | r <sup>†</sup> | p-value |      |
|                                                       |                               |                      |                     |                   |         |      | †                | ‡       |       | †              | ‡       |      |
| Peptostreptococcaceae_[XI][G-7]<br>[Eubacterium]_yuri | 0.07 (0.10)                   | -0.09 (0.19)         | 0.17 (0.13)         | -0.06 (0.23)      | 0.43    | 1.00 | 0.005            | 0.86    | 1.00  | -0.056         | 0.05    | 1.00 |
| Leptotrichia HMT 498                                  | -1.07 (0.09)                  | -1.20 (0.17)         | -0.98 (0.12)        | -1.19 (0.23)      | 0.51    | 1.00 | 0.059            | 0.04    | 1.00  | -0.006         | 0.84    | 1.00 |
| Prevotella veroralis                                  | -1.84 (0.08)                  | -1.80 (0.16)         | -1.88 (0.10)        | -1.79 (0.22)      | 0.90    | 1.00 | 0.056            | 0.05    | 1.00  | -0.023         | 0.42    | 1.00 |
| Aggregatibacter actinomycetemcomitans                 | -3.02 (0.07)                  | -3.01 (0.11)         | -3.03 (0.09)        | -3.00 (0.20)      | 0.98    | 1.00 | -0.081           | 0.005   | 1.00  | 0.040          | 0.17    | 1.00 |
| TM7_[G-3] HMT 351                                     | -1.51 (0.06)                  | -1.53 (0.12)         | -1.49 (0.08)        | -1.53 (0.16)      | 0.95    | 1.00 | -0.001           | 0.97    | 1.00  | -0.004         | 0.90    | 1.00 |
| Prevotella micans                                     | -2.15 (0.07)                  | -2.15 (0.12)         | -2.16 (0.09)        | -2.16 (0.18)      | 1.00    | 1.00 | 0.064            | 0.03    | 1.00  | -0.009         | 0.76    | 1.00 |
| Parvimonas HMT 393                                    | 0.59 (0.11)                   | 0.67 (0.21)          | 0.54 (0.14)         | 0.65 (0.27)       | 0.83    | 1.00 | -0.018           | 0.53    | 1.00  | -0.016         | 0.57    | 1.00 |
| Atopobium HMT 199                                     | -2.26 (0.07)                  | -2.17 (0.14)         | -2.32 (0.09)        | -2.19 (0.20)      | 0.62    | 1.00 | -0.035           | 0.23    | 1.00  | 0.018          | 0.53    | 1.00 |
| Actinomyces meyeri                                    | -0.05 (0.08)                  | -0.20 (0.15)         | 0.06 (0.11)         | -0.22 (0.20)      | 0.24    | 1.00 | 0.032            | 0.27    | 1.00  | 0.040          | 0.16    | 1.00 |
| Prevotella melaninogenica                             | 1.90 (0.08)                   | 1.87 (0.16)          | 1.93 (0.11)         | 1.82 (0.19)       | 0.88    | 1.00 | -0.056           | 0.05    | 1.00  | 0.030          | 0.29    | 1.00 |
| TM7_[G-2] HMT 350                                     | -1.83 (0.09)                  | -1.67 (0.17)         | -1.93 (0.11)        | -1.72 (0.23)      | 0.39    | 1.00 | 0.005            | 0.87    | 1.00  | -0.038         | 0.19    | 1.00 |
| Lachnoanaerobaculum saburreum                         | 1.07 (0.08)                   | 1.00 (0.16)          | 1.14 (0.11)         | 0.93 (0.19)       | 0.54    | 1.00 | -0.021           | 0.47    | 1.00  | 0.019          | 0.51    | 1.00 |
| Actinomyces HMT 178                                   | -0.93 (0.06)                  | -1.00 (0.13)         | -0.86 (0.08)        | -1.06 (0.14)      | 0.41    | 1.00 | -0.098           | <.001   | 0.17  | -0.016         | 0.58    | 1.00 |
| Capnocytophaga HMT 864                                | -1.25 (0.08)                  | -1.15 (0.16)         | -1.30 (0.11)        | -1.23 (0.21)      | 0.77    | 1.00 | -0.005           | 0.87    | 1.00  | -0.022         | 0.45    | 1.00 |
| Solobacterium moorei                                  | -0.52 (0.06)                  | -0.48 (0.13)         | -0.52 (0.09)        | -0.56 (0.16)      | 0.92    | 1.00 | 0.047            | 0.10    | 1.00  | 0.033          | 0.25    | 1.00 |
| Streptococcus parasanguinis_II                        | 0.75 (0.09)                   | 0.67 (0.17)          | 0.83 (0.12)         | 0.59 (0.22)       | 0.56    | 1.00 | -0.104           | <.001   | 0.076 | 0.075          | 0.009   | 1.00 |
| Megasphaera micronuciformis                           | 0.68 (0.09)                   | 0.68 (0.17)          | 0.70 (0.11)         | 0.59 (0.21)       | 0.90    | 1.00 | -0.016           | 0.57    | 1.00  | -0.016         | 0.58    | 1.00 |
| Porphyromonas HMT 278                                 | -2.30 (0.07)                  | -2.15 (0.13)         | -2.37 (0.09)        | -2.27 (0.19)      | 0.39    | 1.00 | 0.006            | 0.83    | 1.00  | 0.021          | 0.47    | 1.00 |
| Actinomyces oris                                      | 2.36 (0.08)                   | 2.21 (0.15)          | 2.51 (0.10)         | 2.09 (0.19)       | 0.07    | 1.00 | -0.082           | 0.004   | 1.00  | 0.024          | 0.41    | 1.00 |
| Selenomonas noxia                                     | 4.81 (0.08)                   | 4.73 (0.16)          | 4.91 (0.10)         | 4.60 (0.17)       | 0.29    | 1.00 | -0.125           | <.001   | 0.004 | -0.013         | 0.64    | 1.00 |
| Leptotrichia shahii                                   | 0.11 (0.10)                   | 0.07 (0.21)          | 0.18 (0.14)         | -0.07 (0.25)      | 0.67    | 1.00 | -0.015           | 0.60    | 1.00  | -0.033         | 0.25    | 1.00 |
| Campylobacter gracilis                                | 5.19 (0.05)                   | 5.13 (0.11)          | 5.27 (0.06)         | 4.99 (0.11)       | 0.09    | 1.00 | -0.038           | 0.18    | 1.00  | 0.008          | 0.78    | 1.00 |
| Pyramidobacter piscolens                              | -3.52 (0.04)                  | -3.35 (0.07)         | -3.61 (0.05)        | -3.49 (0.16)      | 0.03    | 1.00 | -0.141           | <.001   | <.001 | 0.003          | 0.91    | 1.00 |
| Capnocytophaga HMT 326                                | 0.42 (0.10)                   | 0.50 (0.20)          | 0.41 (0.14)         | 0.35 (0.24)       | 0.89    | 1.00 | -0.013           | 0.64    | 1.00  | -0.012         | 0.68    | 1.00 |
| Prevotella loescheii                                  | -1.22 (0.09)                  | -1.14 (0.17)         | -1.24 (0.13)        | -1.30 (0.24)      | 0.85    | 1.00 | -0.030           | 0.29    | 1.00  | -0.004         | 0.90    | 1.00 |
| Prevotella saccharolytica                             | -0.37 (0.07)                  | -0.21 (0.15)         | -0.43 (0.10)        | -0.40 (0.18)      | 0.47    | 1.00 | 0.017            | 0.56    | 1.00  | -0.054         | 0.06    | 1.00 |
| Prevotella salivae                                    | 0.32 (0.08)                   | 0.38 (0.17)          | 0.34 (0.11)         | 0.19 (0.19)       | 0.73    | 1.00 | -0.030           | 0.30    | 1.00  | 0.036          | 0.21    | 1.00 |
| Ruminococcaceae_[G-1] HMT 075                         | -0.80 (0.08)                  | -0.66 (0.16)         | -0.85 (0.10)        | -0.86 (0.18)      | 0.58    | 1.00 | -0.043           | 0.14    | 1.00  | -0.047         | 0.10    | 1.00 |
| Fusobacterium naviforme                               | 3.58 (0.08)                   | 3.58 (0.16)          | 3.63 (0.11)         | 3.38 (0.19)       | 0.52    | 1.00 | -0.029           | 0.32    | 1.00  | -0.035         | 0.22    | 1.00 |
| Selenomonas HMT 892                                   | 0.98 (0.08)                   | 1.05 (0.17)          | 0.98 (0.11)         | 0.85 (0.20)       | 0.74    | 1.00 | 0.042            | 0.14    | 1.00  | 0.018          | 0.54    | 1.00 |
| Campylobacter curvus                                  | -1.67 (0.07)                  | -1.61 (0.14)         | -1.65 (0.10)        | -1.82 (0.18)      | 0.64    | 1.00 | -0.071           | 0.014   | 1.00  | 0.002          | 0.96    | 1.00 |
| Streptococcus cristatus                               | 3.29 (0.07)                   | 3.26 (0.15)          | 3.37 (0.10)         | 3.05 (0.16)       | 0.30    | 1.00 | -0.113           | <.001   | 0.021 | 0.008          | 0.78    | 1.00 |
| Lachnospiraceae_[G-3] HMT 100                         | 0.59 (0.08)                   | 0.70 (0.16)          | 0.58 (0.11)         | 0.48 (0.19)       | 0.69    | 1.00 | -0.045           | 0.12    | 1.00  | -0.051         | 0.08    | 1.00 |
| Megasphaera HMT 123                                   | -2.53 (0.08)                  | -2.28 (0.17)         | -2.64 (0.10)        | -2.52 (0.22)      | 0.18    | 1.00 | 0.012            | 0.68    | 1.00  | 0.037          | 0.20    | 1.00 |

| OTU label                  | Periodontal Disease Category* |                      |                     |                   |         |      | Whole Mouth Mean |         |      |                |         |       |
|----------------------------|-------------------------------|----------------------|---------------------|-------------------|---------|------|------------------|---------|------|----------------|---------|-------|
|                            | Overall<br>(N = 1206)         | None/Mild<br>(n=303) | Moderate<br>(n=703) | Severe<br>(n=200) | p-value |      | PPD              |         |      | CAL            |         |       |
|                            | Mean (SE)                     | Mean (SE)            | Mean<br>(SE)        | Mean<br>(SE)      | †       | ‡    | r <sup>†</sup>   | p-value |      | r <sup>†</sup> | p-value |       |
|                            |                               |                      |                     |                   |         |      |                  | †       | ‡    |                | †       | ‡     |
| TM7_[G-1] HMT 952          | 2.58 (0.10)                   | 2.83 (0.18)          | 2.47 (0.13)         | 2.58 (0.23)       | 0.30    | 1.00 | -0.018           | 0.53    | 1.00 | -0.074         | 0.01    | 1.00  |
| Aggregatibacter HMT 513    | -2.65 (0.07)                  | -2.52 (0.13)         | -2.68 (0.09)        | -2.77 (0.19)      | 0.48    | 1.00 | -0.021           | 0.46    | 1.00 | -0.044         | 0.13    | 1.00  |
| Treponema HMT 247          | -3.45 (0.05)                  | -3.33 (0.07)         | -3.46 (0.06)        | -3.59 (0.14)      | 0.19    | 1.00 | -0.075           | 0.009   | 1.00 | 0.014          | 0.63    | 1.00  |
| Leptotrichia wadei         | 2.15 (0.11)                   | 2.20 (0.21)          | 2.19 (0.14)         | 1.93 (0.24)       | 0.65    | 1.00 | -0.081           | 0.005   | 1.00 | -0.033         | 0.25    | 1.00  |
| Aggregatibacter HMT 458    | -0.25 (0.09)                  | -0.29 (0.17)         | -0.14 (0.12)        | -0.57 (0.20)      | 0.22    | 1.00 | -0.029           | 0.31    | 1.00 | -0.032         | 0.27    | 1.00  |
| Fusobacterium HMT 370      | -2.20 (0.06)                  | -2.11 (0.11)         | -2.19 (0.08)        | -2.40 (0.15)      | 0.28    | 1.00 | 0.013            | 0.65    | 1.00 | 0.008          | 0.77    | 1.00  |
| Capnocytophaga HMT 412     | -1.89 (0.08)                  | -1.71 (0.16)         | -1.93 (0.11)        | -2.01 (0.19)      | 0.41    | 1.00 | 0.022            | 0.45    | 1.00 | -0.031         | 0.27    | 1.00  |
| Selenomonas flueggei       | 0.80 (0.08)                   | 0.94 (0.17)          | 0.79 (0.11)         | 0.63 (0.18)       | 0.47    | 1.00 | -0.018           | 0.54    | 1.00 | -0.065         | 0.02    | 1.00  |
| Atopobium parvulum         | -0.26 (0.08)                  | -0.18 (0.15)         | -0.23 (0.11)        | -0.49 (0.18)      | 0.42    | 1.00 | -0.018           | 0.52    | 1.00 | -0.048         | 0.093   | 1.00  |
| Eikenella corrodens        | 2.87 (0.07)                   | 2.96 (0.14)          | 2.90 (0.09)         | 2.65 (0.15)       | 0.32    | 1.00 | -0.012           | 0.69    | 1.00 | -0.002         | 0.94    | 1.00  |
| Prevotella HMT 313         | -1.50 (0.08)                  | -1.24 (0.16)         | -1.60 (0.10)        | -1.55 (0.20)      | 0.15    | 1.00 | -0.037           | 0.20    | 1.00 | -0.031         | 0.28    | 1.00  |
| TM7_[G-1] HMT 348          | -0.52 (0.08)                  | -0.40 (0.16)         | -0.52 (0.11)        | -0.71 (0.19)      | 0.48    | 1.00 | -0.046           | 0.11    | 1.00 | -0.048         | 0.09    | 1.00  |
| Selenomonas artemidis      | 2.51 (0.11)                   | 2.42 (0.21)          | 2.66 (0.14)         | 2.10 (0.27)       | 0.16    | 1.00 | -0.083           | 0.004   | 1.00 | -0.049         | 0.09    | 1.00  |
| Streptococcus lactarius    | -1.32 (0.07)                  | -1.24 (0.13)         | -1.28 (0.09)        | -1.57 (0.18)      | 0.27    | 1.00 | -0.092           | 0.001   | 0.36 | 0.019          | 0.52    | 1.00  |
| Capnocytophaga granulosa   | 2.73 (0.09)                   | 2.77 (0.19)          | 2.80 (0.12)         | 2.44 (0.21)       | 0.37    | 1.00 | -0.088           | 0.002   | 0.61 | -0.038         | 0.19    | 1.00  |
| Selenomonas HMT 478        | -2.49 (0.06)                  | -2.56 (0.10)         | -2.35 (0.08)        | -2.89 (0.13)      | 0.004   | 1.00 | -0.113           | <.001   | 0.02 | -0.032         | 0.26    | 1.00  |
| Prevotella pallens         | -0.93 (0.08)                  | -0.82 (0.16)         | -0.92 (0.11)        | -1.17 (0.19)      | 0.37    | 1.00 | -0.070           | 0.016   | 1.00 | -0.024         | 0.40    | 1.00  |
| TM7_[G-1] HMT 488          | -0.39 (0.10)                  | -0.35 (0.20)         | -0.31 (0.13)        | -0.70 (0.25)      | 0.37    | 1.00 | -0.071           | 0.013   | 1.00 | -0.053         | 0.07    | 1.00  |
| Neisseria subflava         | -1.88 (0.09)                  | -1.65 (0.17)         | -1.95 (0.12)        | -2.01 (0.23)      | 0.31    | 1.00 | -0.035           | 0.23    | 1.00 | 0.014          | 0.64    | 1.00  |
| Selenomonas HMT 136        | 1.85 (0.09)                   | 2.01 (0.17)          | 1.84 (0.11)         | 1.65 (0.21)       | 0.41    | 1.00 | -0.071           | 0.01    | 1.00 | -0.025         | 0.39    | 1.00  |
| Veillonella HMT 780        | -1.94 (0.08)                  | -1.74 (0.16)         | -1.97 (0.10)        | -2.11 (0.19)      | 0.31    | 1.00 | 0.059            | 0.04    | 1.00 | -0.038         | 0.19    | 1.00  |
| Veillonella rogosae        | 0.89 (0.09)                   | 0.95 (0.19)          | 0.96 (0.12)         | 0.58 (0.22)       | 0.32    | 1.00 | -0.055           | 0.06    | 1.00 | -0.042         | 0.15    | 1.00  |
| Prevotella HMT 475         | -2.87 (0.06)                  | -2.80 (0.10)         | -2.81 (0.08)        | -3.16 (0.14)      | 0.07    | 1.00 | -0.037           | 0.21    | 1.00 | -0.018         | 0.54    | 1.00  |
| Alloprevotella HMT 473     | -1.86 (0.08)                  | -1.92 (0.15)         | -1.72 (0.11)        | -2.29 (0.19)      | 0.03    | 1.00 | -0.016           | 0.58    | 1.00 | -0.030         | 0.30    | 1.00  |
| Selenomonas HMT 149        | -2.62 (0.06)                  | -2.45 (0.11)         | -2.64 (0.07)        | -2.83 (0.16)      | 0.11    | 1.00 | -0.102           | <.001   | 0.10 | -0.062         | 0.03    | 1.00  |
| Veillonella atypica        | 2.86 (0.09)                   | 3.03 (0.17)          | 2.85 (0.12)         | 2.65 (0.20)       | 0.37    | 1.00 | -0.087           | 0.002   | 0.64 | -0.003         | 0.92    | 1.00  |
| Streptococcus HMT 074      | 0.16 (0.07)                   | 0.25 (0.15)          | 0.20 (0.09)         | -0.13 (0.18)      | 0.18    | 1.00 | -0.081           | 0.005   | 1.00 | 0.028          | 0.32    | 1.00  |
| Capnocytophaga HMT 332     | -2.49 (0.07)                  | -2.39 (0.14)         | -2.45 (0.09)        | -2.78 (0.18)      | 0.18    | 1.00 | -0.080           | 0.005   | 1.00 | -0.026         | 0.37    | 1.00  |
| Selenomonas HMT 937        | -2.35 (0.06)                  | -2.20 (0.12)         | -2.34 (0.08)        | -2.61 (0.15)      | 0.09    | 1.00 | -0.091           | 0.001   | 0.40 | -0.074         | 0.01    | 1.00  |
| Mitsuokella HMT 131        | -1.80 (0.09)                  | -1.65 (0.18)         | -1.78 (0.11)        | -2.07 (0.20)      | 0.29    | 1.00 | -0.084           | 0.003   | 0.89 | 0.028          | 0.34    | 1.00  |
| Streptococcus sobrinus     | -3.05 (0.07)                  | -3.00 (0.10)         | -2.97 (0.09)        | -3.43 (0.16)      | 0.03    | 1.00 | -0.089           | 0.002   | 0.51 | -0.020         | 0.48    | 1.00  |
| Leptotrichia hofstadii     | 0.21 (0.10)                   | 0.35 (0.21)          | 0.23 (0.13)         | -0.08 (0.24)      | 0.38    | 1.00 | -0.066           | 0.02    | 1.00 | -0.051         | 0.08    | 1.00  |
| Capnocytophaga leadbetteri | 2.88 (0.09)                   | 2.96 (0.19)          | 2.95 (0.12)         | 2.52 (0.21)       | 0.21    | 1.00 | -0.085           | 0.003   | 0.80 | -0.027         | 0.36    | 1.00  |
| Leptotrichia HMT 223       | -1.82 (0.08)                  | -1.58 (0.16)         | -1.86 (0.10)        | -2.02 (0.20)      | 0.18    | 1.00 | 0.000            | 0.99    | 1.00 | -0.112         | <.001   | 0.028 |
| Actinomyces HMT 180        | 1.44 (0.07)                   | 1.66 (0.14)          | 1.41 (0.09)         | 1.21 (0.16)       | 0.10    | 1.00 | -0.055           | 0.06    | 1.00 | -0.055         | 0.06    | 1.00  |



| OTU label                     | Periodontal Disease Category* |                      |                     |                   |         |      | Whole Mouth Mean |           |           |           |                |         |
|-------------------------------|-------------------------------|----------------------|---------------------|-------------------|---------|------|------------------|-----------|-----------|-----------|----------------|---------|
|                               | Overall<br>(N = 1206)         | None/Mild<br>(n=303) | Moderate<br>(n=703) | Severe<br>(n=200) | p-value |      | PPD              |           |           | CAL       |                |         |
|                               |                               |                      |                     |                   |         |      | Mean (SE)        | Mean (SE) | Mean (SE) | Mean (SE) | r <sup>†</sup> | p-value |
|                               | †                             | ‡                    | †                   | ‡                 | †       | ‡    |                  |           |           |           |                |         |
| Capnocytophaga HMT 903        | -2.17 (0.08)                  | -1.90 (0.15)         | -2.24 (0.10)        | -2.36 (0.19)      | 0.11    | 1.00 | -0.043           | 0.14      | 1.00      | -0.037    | 0.20           | 1.00    |
| Streptococcus sinensis        | -2.13 (0.06)                  | -2.07 (0.11)         | -2.05 (0.08)        | -2.53 (0.14)      | 0.01    | 1.00 | -0.110           | <.001     | 0.035     | 0.002     | 0.93           | 1.00    |
| Capnocytophaga HMT 380        | -2.70 (0.07)                  | -2.52 (0.12)         | -2.70 (0.09)        | -2.97 (0.18)      | 0.10    | 1.00 | -0.085           | 0.003     | 0.81      | -0.038    | 0.19           | 1.00    |
| Capnocytophaga HMT 902        | -1.64 (0.08)                  | -1.57 (0.16)         | -1.56 (0.11)        | -2.02 (0.20)      | 0.12    | 1.00 | -0.058           | 0.05      | 1.00      | 0.007     | 0.80           | 1.00    |
| Streptococcus gordonii        | 4.21 (0.08)                   | 4.17 (0.16)          | 4.37 (0.10)         | 3.69 (0.19)       | 0.008   | 1.00 | -0.102           | <.001     | 0.10      | 0.006     | 0.82           | 1.00    |
| Leptotrichia HMT 879          | -2.59 (0.07)                  | -2.36 (0.14)         | -2.62 (0.09)        | -2.85 (0.16)      | 0.06    | 1.00 | -0.064           | 0.03      | 1.00      | -0.042    | 0.14           | 1.00    |
| Aggregatibacter segnis        | -0.77 (0.10)                  | -0.66 (0.19)         | -0.72 (0.13)        | -1.15 (0.23)      | 0.21    | 1.00 | -0.023           | 0.43      | 1.00      | -0.032    | 0.27           | 1.00    |
| Streptococcus parasanguinis_I | -0.26 (0.08)                  | -0.18 (0.15)         | -0.17 (0.10)        | -0.68 (0.17)      | 0.04    | 1.00 | -0.126           | <.001     | 0.003     | -0.005    | 0.85           | 1.00    |
| Leptotrichia HMT 417          | 0.84 (0.09)                   | 0.81 (0.18)          | 1.00 (0.12)         | 0.30 (0.21)       | 0.02    | 1.00 | -0.027           | 0.35      | 1.00      | -0.022    | 0.44           | 1.00    |
| Leptotrichia HMT 215          | -0.04 (0.08)                  | 0.10 (0.16)          | 0.00 (0.11)         | -0.41 (0.20)      | 0.11    | 1.00 | -0.048           | 0.09      | 1.00      | -0.025    | 0.39           | 1.00    |
| Capnocytophaga HMT 323        | -1.94 (0.08)                  | -1.67 (0.16)         | -1.99 (0.11)        | -2.18 (0.18)      | 0.10    | 1.00 | -0.125           | <.001     | 0.003     | -0.043    | 0.13           | 1.00    |
| Actinobaculum HMT 183         | 0.33 (0.08)                   | 0.51 (0.16)          | 0.35 (0.10)         | 0.00 (0.18)       | 0.12    | 1.00 | -0.043           | 0.14      | 1.00      | -0.032    | 0.27           | 1.00    |
| Prevotella HMT 472            | 0.45 (0.10)                   | 0.74 (0.21)          | 0.39 (0.13)         | 0.22 (0.24)       | 0.21    | 1.00 | -0.018           | 0.53      | 1.00      | -0.058    | 0.05           | 1.00    |
| Actinomyces gerencseriae      | 0.57 (0.08)                   | 0.61 (0.15)          | 0.68 (0.10)         | 0.09 (0.18)       | 0.02    | 1.00 | -0.139           | <.001     | <.001     | -0.056    | 0.05           | 1.00    |
| Scardovia wiggisiae           | -1.93 (0.09)                  | -1.72 (0.17)         | -1.94 (0.12)        | -2.24 (0.21)      | 0.17    | 1.00 | -0.056           | 0.05      | 1.00      | -0.035    | 0.22           | 1.00    |
| GN02_[G-2] HMT 873            | -3.06 (0.05)                  | -2.83 (0.11)         | -3.06 (0.07)        | -3.37 (0.13)      | 0.008   | 1.00 | -0.104           | <.001     | 0.08      | 0.014     | 0.64           | 1.00    |
| Aggregatibacter aphrophilus   | -0.29 (0.11)                  | -0.15 (0.22)         | -0.24 (0.15)        | -0.69 (0.25)      | 0.25    | 1.00 | -0.063           | 0.03      | 1.00      | -0.011    | 0.70           | 1.00    |
| Neisseria pharyngis           | -2.86 (0.06)                  | -2.62 (0.12)         | -2.88 (0.08)        | -3.17 (0.15)      | 0.02    | 1.00 | -0.077           | 0.008     | 1.00      | -0.030    | 0.30           | 1.00    |
| Granulicatella adiacens       | 4.17 (0.06)                   | 4.36 (0.11)          | 4.19 (0.08)         | 3.82 (0.15)       | 0.015   | 1.00 | -0.165           | <.001     | <.001     | 0.006     | 0.83           | 1.00    |
| Corynebacterium matruchotii   | 4.83 (0.07)                   | 5.05 (0.14)          | 4.83 (0.10)         | 4.50 (0.15)       | 0.05    | 1.00 | -0.099           | <.001     | 0.16      | -0.035    | 0.23           | 1.00    |
| TM7_[G-6] HMT 870             | -1.71 (0.08)                  | -1.53 (0.15)         | -1.67 (0.10)        | -2.10 (0.19)      | 0.06    | 1.00 | -0.042           | 0.14      | 1.00      | -0.029    | 0.32           | 1.00    |
| Kingella denitrificans        | 0.55 (0.09)                   | 0.76 (0.18)          | 0.57 (0.12)         | 0.19 (0.21)       | 0.12    | 1.00 | -0.070           | 0.01      | 1.00      | -0.025    | 0.38           | 1.00    |
| Bergeyella HMT 907            | -1.81 (0.07)                  | -1.72 (0.14)         | -1.71 (0.09)        | -2.31 (0.15)      | 0.006   | 1.00 | -0.083           | 0.004     | 1.00      | -0.010    | 0.72           | 1.00    |
| Neisseria sicca               | 1.73 (0.11)                   | 2.11 (0.22)          | 1.64 (0.14)         | 1.51 (0.27)       | 0.13    | 1.00 | -0.023           | 0.43      | 1.00      | 0.005     | 0.85           | 1.00    |
| Leptotrichia HMT 392          | 0.34 (0.09)                   | 0.61 (0.19)          | 0.31 (0.12)         | 0.01 (0.22)       | 0.11    | 1.00 | -0.017           | 0.56      | 1.00      | -0.081    | 0.005          | 1.00    |
| Leptotrichia HMT 225          | -0.78 (0.10)                  | -0.58 (0.20)         | -0.75 (0.12)        | -1.18 (0.23)      | 0.14    | 1.00 | -0.058           | 0.05      | 1.00      | -0.074    | 0.010          | 1.00    |
| Veillonella dispar            | 8.26 (0.06)                   | 8.42 (0.13)          | 8.31 (0.08)         | 7.82 (0.14)       | 0.004   | 1.00 | -0.146           | <.001     | <.001     | -0.033    | 0.25           | 1.00    |
| Streptococcus australis       | -1.51 (0.07)                  | -1.28 (0.15)         | -1.50 (0.09)        | -1.89 (0.17)      | 0.03    | 1.00 | -0.122           | <.001     | 0.006     | -0.042    | 0.14           | 1.00    |
| Selenomonas HMT 137           | 0.95 (0.11)                   | 1.23 (0.23)          | 0.92 (0.15)         | 0.59 (0.28)       | 0.20    | 1.00 | -0.022           | 0.44      | 1.00      | -0.019    | 0.51           | 1.00    |
| Haemophilus haemolyticus      | -1.81 (0.08)                  | -1.58 (0.16)         | -1.79 (0.10)        | -2.22 (0.18)      | 0.04    | 1.00 | -0.042           | 0.15      | 1.00      | 0.002     | 0.94           | 1.00    |
| Neisseria bacilliformis       | -1.89 (0.09)                  | -1.66 (0.18)         | -1.86 (0.12)        | -2.30 (0.20)      | 0.07    | 1.00 | -0.086           | 0.003     | 0.76      | -0.011    | 0.72           | 1.00    |
| Gemella sanguinis             | -0.19 (0.07)                  | 0.11 (0.14)          | -0.22 (0.09)        | -0.55 (0.17)      | 0.01    | 1.00 | -0.139           | <.001     | <.001     | -0.046    | 0.11           | 1.00    |
| Rothia mucilaginosa           | 1.95 (0.08)                   | 2.05 (0.15)          | 2.08 (0.10)         | 1.39 (0.19)       | 0.004   | 1.00 | -0.151           | <.001     | <.001     | 0.007     | 0.81           | 1.00    |
| Gemella morbillorum           | 3.16 (0.09)                   | 3.36 (0.18)          | 3.21 (0.12)         | 2.70 (0.21)       | 0.06    | 1.00 | -0.059           | 0.04      | 1.00      | -0.032    | 0.26           | 1.00    |
| SR1_[G-1] HMT 874             | -1.98 (0.07)                  | -1.59 (0.14)         | -2.06 (0.09)        | -2.26 (0.16)      | 0.002   | 0.60 | -0.086           | 0.003     | 0.76      | -0.059    | 0.04           | 1.00    |

| OTU label                                  | Periodontal Disease Category* |                      |                     |                   |         |      | Whole Mouth Mean |           |           |           |                |         |
|--------------------------------------------|-------------------------------|----------------------|---------------------|-------------------|---------|------|------------------|-----------|-----------|-----------|----------------|---------|
|                                            | Overall<br>(N = 1206)         | None/Mild<br>(n=303) | Moderate<br>(n=703) | Severe<br>(n=200) | p-value |      | PPD              |           |           | CAL       |                |         |
|                                            |                               |                      |                     |                   |         |      | Mean (SE)        | Mean (SE) | Mean (SE) | Mean (SE) | r <sup>†</sup> | p-value |
|                                            | †                             | ‡                    | †                   | ‡                 |         |      |                  |           |           |           |                |         |
| Ottowia HMT 894                            | -1.30 (0.08)                  | -0.97 (0.16)         | -1.34 (0.11)        | -1.64 (0.19)      | 0.03    | 1.00 | -0.085           | 0.003     | 0.85      | -0.049    | 0.09           | 1.00    |
| Porphyromonas HMT 284                      | 0.09 (0.10)                   | 0.34 (0.20)          | 0.11 (0.12)         | -0.33 (0.23)      | 0.08    | 1.00 | -0.043           | 0.13      | 1.00      | -0.047    | 0.10           | 1.00    |
| Prevotella histicola                       | -0.76 (0.09)                  | -0.39 (0.18)         | -0.83 (0.12)        | -1.07 (0.21)      | 0.04    | 1.00 | -0.092           | 0.001     | 0.38      | 0.005     | 0.85           | 1.00    |
| TM7_[G-1] HMT 347                          | -0.96 (0.09)                  | -0.67 (0.18)         | -0.97 (0.12)        | -1.35 (0.23)      | 0.06    | 1.00 | -0.057           | 0.05      | 1.00      | -0.048    | 0.09           | 1.00    |
| Fusobacterium nucleatum_subsp._polymorphum | 5.19 (0.07)                   | 5.33 (0.14)          | 5.29 (0.09)         | 4.64 (0.16)       | <.001   | 0.26 | -0.130           | <.001     | 0.002     | -0.082    | 0.004          | 1.00    |
| Prevotella HMT 306                         | -2.10 (0.07)                  | -1.81 (0.14)         | -2.11 (0.10)        | -2.51 (0.16)      | 0.01    | 1.00 | -0.123           | <.001     | 0.005     | -0.030    | 0.30           | 1.00    |
| Fusobacterium periodonticum                | -0.02 (0.07)                  | 0.31 (0.16)          | -0.06 (0.10)        | -0.39 (0.18)      | 0.01    | 1.00 | -0.093           | 0.001     | 0.33      | -0.042    | 0.15           | 1.00    |
| Actinomyces HMT 171                        | 0.67 (0.08)                   | 0.77 (0.15)          | 0.79 (0.10)         | 0.07 (0.19)       | 0.003   | 0.77 | -0.113           | <.001     | 0.02      | -0.077    | 0.008          | 1.00    |
| Neisseria elongata                         | 1.66 (0.10)                   | 1.82 (0.21)          | 1.74 (0.14)         | 1.11 (0.24)       | 0.06    | 1.00 | -0.084           | 0.004     | 0.97      | -0.051    | 0.08           | 1.00    |
| Veillonella denticariosi                   | -1.36 (0.09)                  | -1.12 (0.18)         | -1.33 (0.12)        | -1.83 (0.21)      | 0.04    | 1.00 | -0.114           | <.001     | 0.02      | -0.041    | 0.16           | 1.00    |
| Lachnoanaerobaculum umeaense               | -0.47 (0.07)                  | -0.24 (0.16)         | -0.43 (0.09)        | -0.97 (0.17)      | 0.006   | 1.00 | -0.092           | 0.001     | 0.37      | -0.071    | 0.01           | 1.00    |
| Alloprevotella HMT 308                     | -1.14 (0.07)                  | -0.95 (0.13)         | -1.08 (0.09)        | -1.67 (0.16)      | 0.002   | 0.46 | -0.106           | <.001     | 0.06      | -0.080    | 0.006          | 1.00    |
| Streptococcus mutans                       | 1.39 (0.11)                   | 1.61 (0.22)          | 1.44 (0.15)         | 0.87 (0.24)       | 0.09    | 1.00 | -0.117           | <.001     | 0.01      | 0.001     | 0.96           | 1.00    |
| Campylobacter concisus                     | 2.41 (0.06)                   | 2.62 (0.13)          | 2.46 (0.08)         | 1.89 (0.16)       | <.001   | 0.24 | -0.094           | 0.001     | 0.29      | -0.039    | 0.17           | 1.00    |
| Leptotrichia hongkongensis                 | 2.02 (0.09)                   | 2.17 (0.19)          | 2.12 (0.12)         | 1.43 (0.22)       | 0.02    | 1.00 | -0.055           | 0.06      | 1.00      | -0.039    | 0.17           | 1.00    |
| Lactobacillus gasseri                      | -2.95 (0.06)                  | -2.70 (0.12)         | -2.92 (0.09)        | -3.45 (0.14)      | <.001   | 0.20 | -0.139           | <.001     | <.001     | -0.029    | 0.31           | 1.00    |
| Actinomyces johnsonii                      | 0.98 (0.07)                   | 1.24 (0.14)          | 1.00 (0.10)         | 0.49 (0.18)       | 0.004   | 1.00 | -0.099           | <.001     | 0.15      | -0.140    | <.001          | <.001   |
| Veillonella parvula                        | 7.61 (0.07)                   | 7.82 (0.13)          | 7.67 (0.09)         | 7.06 (0.17)       | <.001   | 0.18 | -0.133           | <.001     | <.001     | -0.055    | 0.05           | 1.00    |
| Corynebacterium durum                      | 0.94 (0.08)                   | 1.21 (0.16)          | 0.97 (0.11)         | 0.43 (0.20)       | 0.010   | 1.00 | -0.128           | <.001     | 0.002     | -0.078    | 0.007          | 1.00    |
| TM7_[G-1] HMT 352                          | -1.15 (0.07)                  | -0.73 (0.15)         | -1.23 (0.09)        | -1.52 (0.18)      | <.001   | 0.19 | -0.089           | 0.002     | 0.50      | -0.039    | 0.18           | 1.00    |
| Lachnoanaerobaculum orale                  | -1.33 (0.07)                  | -1.01 (0.14)         | -1.33 (0.09)        | -1.80 (0.15)      | <.001   | 0.21 | -0.097           | <.001     | 0.20      | -0.086    | 0.003          | 0.74    |
| Neisseria flavescens                       | 1.24 (0.10)                   | 1.50 (0.19)          | 1.28 (0.13)         | 0.70 (0.22)       | 0.03    | 1.00 | -0.074           | 0.010     | 1.00      | 0.013     | 0.65           | 1.00    |
| Actinomyces HMT 169                        | 1.90 (0.09)                   | 2.05 (0.17)          | 2.03 (0.11)         | 1.23 (0.22)       | 0.003   | 0.78 | -0.123           | <.001     | 0.005     | -0.062    | 0.03           | 1.00    |
| Rothia dentocariosa                        | 4.29 (0.09)                   | 4.41 (0.16)          | 4.44 (0.11)         | 3.59 (0.23)       | 0.001   | 0.32 | -0.138           | <.001     | <.001     | -0.052    | 0.07           | 1.00    |
| Bergeyella HMT 322                         | 2.09 (0.07)                   | 2.35 (0.14)          | 2.15 (0.09)         | 1.52 (0.15)       | <.001   | 0.09 | -0.164           | <.001     | <.001     | -0.077    | 0.007          | 1.00    |
| Cardiobacterium valvarum                   | 1.52 (0.09)                   | 1.71 (0.17)          | 1.61 (0.11)         | 0.88 (0.20)       | 0.005   | 1.00 | -0.078           | 0.007     | 1.00      | -0.081    | 0.005          | 1.00    |
| TM7_[G-1] HMT 869                          | -1.60 (0.09)                  | -1.21 (0.19)         | -1.64 (0.12)        | -2.04 (0.21)      | 0.01    | 1.00 | -0.057           | 0.05      | 1.00      | -0.070    | 0.02           | 1.00    |
| Neisseria oralis                           | 0.33 (0.11)                   | 0.71 (0.21)          | 0.31 (0.14)         | -0.14 (0.25)      | 0.04    | 1.00 | -0.005           | 0.86      | 1.00      | -0.066    | 0.02           | 1.00    |
| Actinomyces HMT 170                        | -1.29 (0.08)                  | -0.89 (0.17)         | -1.33 (0.11)        | -1.74 (0.20)      | 0.005   | 1.00 | -0.109           | <.001     | 0.04      | -0.076    | 0.009          | 1.00    |
| Granulicatella elegans                     | -1.60 (0.07)                  | -1.23 (0.16)         | -1.62 (0.10)        | -2.09 (0.17)      | 0.001   | 0.30 | -0.007           | 0.82      | 1.00      | -0.041    | 0.15           | 1.00    |
| Streptococcus sanguinis                    | 4.94 (0.07)                   | 5.29 (0.15)          | 4.94 (0.09)         | 4.41 (0.19)       | <.001   | 0.20 | -0.189           | <.001     | <.001     | -0.110    | <.001          | 0.03    |
| Capnocytophaga gingivalis                  | 3.38 (0.08)                   | 3.67 (0.16)          | 3.43 (0.10)         | 2.79 (0.18)       | 0.001   | 0.30 | -0.165           | <.001     | <.001     | -0.093    | 0.001          | 0.34    |
| Abiotrophia defectiva                      | -0.13 (0.09)                  | 0.35 (0.18)          | -0.22 (0.11)        | -0.55 (0.21)      | 0.002   | 0.51 | -0.071           | 0.01      | 1.00      | -0.055    | 0.06           | 1.00    |
| Leptotrichia HMT 219                       | -1.32 (0.07)                  | -0.98 (0.15)         | -1.31 (0.10)        | -1.90 (0.17)      | <.001   | 0.12 | -0.115           | <.001     | 0.02      | -0.123    | <.001          | 0.005   |

| OTU label                      | Periodontal Disease Category* |                      |                     |                   |           |           | Whole Mouth Mean |           |                |         |                |         |
|--------------------------------|-------------------------------|----------------------|---------------------|-------------------|-----------|-----------|------------------|-----------|----------------|---------|----------------|---------|
|                                | Overall<br>(N = 1206)         | None/Mild<br>(n=303) | Moderate<br>(n=703) | Severe<br>(n=200) | p-value   |           | PPD              |           | CAL            |         |                |         |
|                                |                               |                      |                     |                   | Mean (SE) | Mean (SE) | Mean (SE)        | Mean (SE) | r <sup>†</sup> | p-value | r <sup>†</sup> | p-value |
|                                |                               |                      |                     |                   | †         | ‡         | †                | ‡         | †              | ‡       | †              | ‡       |
| Porphyromonas HMT 275          | -2.11 (0.08)                  | -1.69 (0.16)         | -2.15 (0.10)        | -2.61 (0.17)      | <.001     | 0.12      | -0.111           | <.001     | 0.03           | -0.082  | 0.004          | 1.00    |
| Kingella oralis                | 2.68 (0.08)                   | 3.08 (0.16)          | 2.67 (0.10)         | 2.14 (0.19)       | <.001     | 0.26      | -0.125           | <.001     | 0.003          | -0.048  | 0.09           | 1.00    |
| Porphyromonas catoniae         | -0.91 (0.09)                  | -0.52 (0.18)         | -0.93 (0.11)        | -1.47 (0.20)      | 0.003     | 0.77      | -0.069           | 0.016     | 1.00           | -0.076  | 0.009          | 1.00    |
| Cardiobacterium hominis        | 2.23 (0.08)                   | 2.44 (0.17)          | 2.35 (0.10)         | 1.49 (0.19)       | <.001     | 0.05      | -0.126           | <.001     | 0.003          | -0.089  | 0.002          | 0.52    |
| Porphyromonas HMT 279          | 1.50 (0.09)                   | 1.78 (0.18)          | 1.57 (0.12)         | 0.83 (0.22)       | 0.003     | 0.74      | -0.097           | <.001     | 0.19           | -0.021  | 0.48           | 1.00    |
| Bradyrhizobium elkanii         | -2.53 (0.08)                  | -2.11 (0.16)         | -2.56 (0.10)        | -3.06 (0.18)      | <.001     | 0.13      | -0.134           | <.001     | <.001          | -0.054  | 0.060          | 1.00    |
| Streptococcus salivarius       | 3.02 (0.08)                   | 3.44 (0.16)          | 2.99 (0.11)         | 2.47 (0.19)       | <.001     | 0.26      | -0.123           | <.001     | 0.005          | -0.030  | 0.30           | 1.00    |
| Capnocytophaga sputigena       | 2.11 (0.10)                   | 2.35 (0.19)          | 2.22 (0.12)         | 1.37 (0.23)       | 0.002     | 0.51      | -0.133           | <.001     | <.001          | -0.078  | 0.006          | 1.00    |
| Aggregatibacter paraphrophilus | -1.82 (0.09)                  | -1.54 (0.17)         | -1.73 (0.12)        | -2.56 (0.19)      | <.001     | 0.15      | -0.087           | 0.002     | 0.64           | -0.088  | 0.002          | 0.60    |
| Leptotrichia HMT 212           | 1.46 (0.09)                   | 1.83 (0.19)          | 1.51 (0.12)         | 0.72 (0.21)       | <.001     | 0.12      | -0.143           | <.001     | <.001          | -0.096  | <.001          | 0.23    |
| Haemophilus HMT 036            | -1.02 (0.09)                  | -0.59 (0.18)         | -1.00 (0.12)        | -1.71 (0.21)      | <.001     | 0.08      | -0.080           | 0.006     | 1.00           | -0.068  | 0.02           | 1.00    |
| Streptococcus intermedius      | 3.95 (0.10)                   | 4.34 (0.18)          | 4.00 (0.13)         | 3.14 (0.24)       | <.001     | 0.08      | -0.105           | <.001     | 0.07           | -0.099  | <.001          | 0.16    |

SE, standard error; PD, pocket depth; CAL, clinical attachment level.

\*Periodontal disease presence and severity defined by CDC/AAP criteria (Eke et al., 2012).

††Pearson Product-Moment correlation coefficient.

†Uncorrected P-value.

‡Bonferroni corrected P-value.

**Appendix Table 2.** Prevalence (% present at any abundance) of the 267 identified taxa according to categories of periodontal disease. OTUs rank-sorted from largest to smallest difference in prevalence between Severe and None/Mild.

| Rank | OTU Label                                             | Periodontal Disease Category* |                            |                          | P-Value |
|------|-------------------------------------------------------|-------------------------------|----------------------------|--------------------------|---------|
|      |                                                       | None/Mild<br>(n=303)<br>(%)   | Moderate<br>(N=703)<br>(%) | Severe<br>(n=200)<br>(%) |         |
| 233  | Anaerolineae_[G-1] HMT 439                            | 16.2                          | 29.0                       | 56.5                     | <.001   |
| 209  | Peptostreptococcaceae_[XI][G-6]<br>[Eubacterium]_noda | 24.8                          | 35.8                       | 60.0                     | <.001   |
| 253  | Fretibacterium HMT 361                                | 9.2                           | 17.4                       | 36.5                     | <.001   |
| 177  | Desulfobulbus HMT 041                                 | 37.6                          | 49.5                       | 72.5                     | <.001   |
| 169  | Fretibacterium HMT 362                                | 41.3                          | 52.9                       | 73.5                     | <.001   |
| 195  | Pseudoramibacter alactolyticus                        | 27.7                          | 41.3                       | 59.0                     | <.001   |
| 256  | Johnsonella HMT 166                                   | 7.9                           | 16.4                       | 31.0                     | <.001   |
| 248  | Prevotella HMT 526                                    | 12.9                          | 19.5                       | 37.5                     | <.001   |
| 225  | Bacteroidaceae_[G-1] HMT 272                          | 22.4                          | 33.0                       | 51.0                     | <.001   |
| 251  | Fretibacterium HMT 358                                | 11.6                          | 18.1                       | 34.5                     | <.001   |
| 223  | Lachnospiraceae_[G-8] HMT 500                         | 23.4                          | 35.3                       | 50.5                     | <.001   |
| 221  | Veillonellaceae_[G-1] HMT 145                         | 29.0                          | 32.4                       | 54.0                     | <.001   |
| 82   | Actinomyces israelii                                  | 71.6                          | 82.9                       | 92.5                     | <.001   |
| 237  | Peptostreptococcaceae_[XI][G-5]<br>[Eubacterium]_saph | 20.5                          | 27.3                       | 44.0                     | <.001   |
| 117  | Dialister pneumosintes                                | 61.4                          | 70.6                       | 84.5                     | <.001   |
| 203  | Prevotella dentalis                                   | 29.7                          | 39.0                       | 53.5                     | <.001   |
| 185  | Mycoplasma salivarium                                 | 37.6                          | 44.2                       | 61.0                     | <.001   |
| 135  | Prevotella oralis                                     | 55.8                          | 64.3                       | 78.5                     | <.001   |
| 226  | Prevotella baroniae                                   | 26.1                          | 31.7                       | 47.5                     | <.001   |
| 247  | Prevotella HMT 376                                    | 15.5                          | 20.3                       | 34.0                     | <.001   |
| 144  | Treponema maltophilum                                 | 51.5                          | 61.3                       | 73.5                     | <.001   |
| 107  | Streptococcus constellatus                            | 64.7                          | 73.5                       | 84.5                     | <.001   |
| 238  | Treponema HMT 237                                     | 22.4                          | 25.0                       | 40.5                     | <.001   |
| 267  | Pyramidobacter piscolens                              | 2.3                           | 3.1                        | 10.0                     | <.001   |
| 118  | Fretibacterium HMT 359                                | 63.7                          | 70.1                       | 82.5                     | <.001   |
| 190  | Prevotella intermedia                                 | 36.6                          | 41.4                       | 56.5                     | <.001   |
| 217  | Selenomonas HMT 442                                   | 30.7                          | 34.3                       | 49.5                     | <.001   |
| 211  | Bacteroidetes_[G-5] HMT 511                           | 31.0                          | 35.4                       | 50.0                     | <.001   |
| 84   | Oribacterium HMT 078                                  | 73.6                          | 82.5                       | 88.5                     | <.001   |
| 76   | Tannerella forsythia                                  | 77.6                          | 82.4                       | 92.5                     | <.001   |
| 163  | Porphyromonas gingivalis                              | 46.2                          | 56.3                       | 65.5                     | <.001   |

| Rank | OTU Label                             | Periodontal Disease Category* |                            |                          | P-Value |
|------|---------------------------------------|-------------------------------|----------------------------|--------------------------|---------|
|      |                                       | None/Mild<br>(n=303)<br>(%)   | Moderate<br>(N=703)<br>(%) | Severe<br>(n=200)<br>(%) |         |
| 109  | Selenomonas HMT 134                   | 66.3                          | 72.3                       | 83.5                     | <.001   |
| 234  | Selenomonas HMT 133                   | 22.1                          | 31.0                       | 39.5                     | <.001   |
| 159  | Treponema denticola                   | 48.2                          | 55.9                       | 67.0                     | <.001   |
| 91   | Veillonellaceae_[G-1] HMT 150         | 74.6                          | 79.4                       | 89.5                     | <.001   |
| 255  | Treponema medium                      | 11.9                          | 18.3                       | 26.0                     | <.001   |
| 130  | Actinomyces HMT 178                   | 58.1                          | 66.6                       | 75.0                     | <.001   |
| 196  | Veillonellaceae_[G-1] HMT 129         | 35.3                          | 39.7                       | 52.5                     | <.001   |
| 60   | Anaeroglobus geminatus                | 82.2                          | 88.1                       | 93.5                     | <.001   |
| 228  | Selenomonas diana                     | 25.7                          | 33.1                       | 42.0                     | <.001   |
| 132  | Stomatobaculum longum                 | 60.4                          | 64.9                       | 76.5                     | <.001   |
| 261  | Aggregatibacter actinomycetemcomitans | 7.9                           | 12.1                       | 19.0                     | <.001   |
| 126  | Olsenella HMT 807                     | 60.1                          | 66.9                       | 76.0                     | 0.001   |
| 157  | Alloprevotella rava                   | 49.2                          | 56.3                       | 65.5                     | 0.001   |
| 259  | Butyrivibrio HMT 080                  | 8.9                           | 15.1                       | 20.0                     | 0.002   |
| 258  | Prevotella multiformis                | 10.9                          | 15.2                       | 22.5                     | 0.002   |
| 95   | Fretibacterium fastidiosum            | 74.6                          | 78.8                       | 87.5                     | 0.002   |
| 143  | Selenomonas HMT 126                   | 57.8                          | 60.6                       | 72.5                     | 0.002   |
| 184  | Campylobacter curvus                  | 39.3                          | 46.9                       | 55.0                     | 0.002   |
| 246  | Treponema vincentii                   | 15.8                          | 22.3                       | 28.5                     | 0.003   |
| 79   | Prevotella maculosa                   | 78.2                          | 81.9                       | 90.0                     | 0.003   |
| 78   | Prevotella HMT 300                    | 76.9                          | 83.1                       | 88.5                     | 0.003   |
| 183  | Filifactor alocis                     | 44.2                          | 44.5                       | 57.5                     | 0.003   |
| 52   | Treponema socranskii                  | 84.8                          | 88.9                       | 94.5                     | 0.003   |
| 106  | Atopobium rimae                       | 68.0                          | 73.1                       | 81.5                     | 0.004   |
| 127  | Actinobaculum HMT 848                 | 58.4                          | 68.3                       | 70.5                     | 0.004   |
| 189  | Tannerella HMT 808                    | 38.9                          | 41.5                       | 53.0                     | 0.005   |
| 153  | Selenomonas HMT 936                   | 48.8                          | 59.3                       | 60.0                     | 0.005   |
| 155  | Prevotella buccae                     | 52.8                          | 55.0                       | 66.5                     | 0.005   |
| 114  | TM7_[G-5] HMT 356                     | 69.0                          | 69.3                       | 80.5                     | 0.006   |
| 218  | Selenomonas HMT 478                   | 28.1                          | 38.3                       | 38.0                     | 0.006   |
| 212  | Capnocytophaga HMT 323                | 35.0                          | 34.6                       | 46.5                     | 0.007   |
| 168  | Prevotella HMT 292                    | 48.2                          | 53.8                       | 62.5                     | 0.007   |
| 160  | Peptostreptococcus stomatis           | 51.2                          | 55.0                       | 65.0                     | 0.008   |
| 23   | Parvimonas micra                      | 94.7                          | 97.2                       | 99.5                     | 0.008   |
| 200  | Bifidobacterium dentium               | 36.0                          | 39.7                       | 49.5                     | 0.009   |
| 49   | Fretibacterium HMT 360                | 86.1                          | 90.2                       | 94.5                     | 0.009   |
| 149  | Streptococcus australis               | 52.5                          | 62.7                       | 61.0                     | 0.009   |

| Rank | OTU Label                                                | Periodontal Disease Category* |                            |                          | P-Value |
|------|----------------------------------------------------------|-------------------------------|----------------------------|--------------------------|---------|
|      |                                                          | None/Mild<br>(n=303)<br>(%)   | Moderate<br>(N=703)<br>(%) | Severe<br>(n=200)<br>(%) |         |
| 125  | <i>Centipeda periodontii</i>                             | 61.7                          | 67.9                       | 74.5                     | 0.011   |
| 89   | <i>Prevotella oulorum</i>                                | 74.3                          | 81.4                       | 84.0                     | 0.011   |
| 63   | <i>Alloprevotella tannerae</i>                           | 84.8                          | 86.5                       | 93.5                     | 0.011   |
| 85   | <i>Prevotella salivae</i>                                | 75.6                          | 81.9                       | 85.5                     | 0.012   |
| 167  | Peptostreptococcaceae_[XI][G-1]<br>[Eubacterium]_infi    | 49.8                          | 53.3                       | 63.0                     | 0.013   |
| 65   | <i>Catonella morbi</i>                                   | 82.8                          | 86.5                       | 92.0                     | 0.013   |
| 166  | <i>Johnsonella ignava</i>                                | 50.8                          | 53.2                       | 63.5                     | 0.013   |
| 68   | <i>Selenomonas infelix</i>                               | 81.2                          | 85.8                       | 90.5                     | 0.014   |
| 232  | <i>Prevotella</i> HMT 314                                | 30.4                          | 28.7                       | 39.0                     | 0.021   |
| 39   | TM7_[G-1] HMT 349                                        | 87.8                          | 92.3                       | 94.0                     | 0.023   |
| 257  | <i>Streptococcus sobrinus</i>                            | 10.9                          | 17.6                       | 16.0                     | 0.026   |
| 136  | <i>Streptococcus sinensis</i>                            | 58.1                          | 66.9                       | 62.5                     | 0.026   |
| 205  | <i>Capnocytophaga</i> HMT 412                            | 34.7                          | 38.5                       | 46.5                     | 0.027   |
| 121  | <i>Lachnoanaerobaculum umeaense</i>                      | 64.0                          | 72.1                       | 67.0                     | 0.029   |
| 141  | <i>Porphyromonas endodontalis</i>                        | 59.1                          | 62.6                       | 70.5                     | 0.032   |
| 188  | <i>Treponema</i> HMT 231                                 | 38.6                          | 43.8                       | 50.0                     | 0.041   |
| 266  | <i>Treponema</i> HMT 247                                 | 2.6                           | 5.0                        | 7.5                      | 0.042   |
| 67   | <i>Prevotella denticola</i>                              | 82.5                          | 85.2                       | 90.5                     | 0.044   |
| 64   | <i>Fusobacterium nucleatum</i> _subsp._ <i>nucleatum</i> | 82.8                          | 87.5                       | 90.0                     | 0.045   |
| 244  | <i>Megasphaera</i> HMT 123                               | 21.8                          | 23.6                       | 31.0                     | 0.048   |
| 108  | <i>Tannerella</i> HMT 286                                | 67.3                          | 74.3                       | 75.5                     | 0.048   |
| 31   | <i>Prevotella nigrescens</i>                             | 92.4                          | 94.0                       | 97.5                     | 0.055   |
| 105  | Lachnospiraceae_[G-3] HMT 100                            | 70.6                          | 72.8                       | 80.0                     | 0.056   |
| 110  | <i>Leptotrichia buccalis</i>                             | 67.3                          | 73.1                       | 76.5                     | 0.057   |
| 56   | TM7_[G-1] HMT 952                                        | 89.4                          | 86.6                       | 92.5                     | 0.058   |
| 230  | <i>Prevotella micans</i>                                 | 29.4                          | 30.3                       | 38.5                     | 0.059   |
| 69   | <i>Prevotella</i> HMT 317                                | 83.2                          | 84.6                       | 90.5                     | 0.060   |
| 9    | <i>Rothia dentocariosa</i>                               | 98.3                          | 99.7                       | 99.0                     | 0.063   |
| 242  | <i>Capnocytophaga</i> HMT 332                            | 20.1                          | 27.0                       | 25.0                     | 0.068   |
| 129  | <i>Leptotrichia hofstadii</i>                            | 60.7                          | 67.3                       | 69.5                     | 0.068   |
| 139  | <i>Prevotella pallens</i>                                | 61.1                          | 62.4                       | 70.5                     | 0.069   |
| 147  | Peptostreptococcaceae_[XI][G-7]<br>[Eubacterium]_yuri    | 54.8                          | 62.4                       | 60.5                     | 0.074   |
| 142  | <i>Prevotella saccharolytica</i>                         | 61.4                          | 61.6                       | 70.0                     | 0.077   |
| 152  | Ruminococcaceae_[G-1] HMT 075                            | 55.1                          | 55.5                       | 64.0                     | 0.079   |
| 210  | <i>Selenomonas</i> HMT 937                               | 31.7                          | 38.7                       | 39.5                     | 0.079   |

| Rank | OTU Label                                                                         | Periodontal Disease Category* |                            |                          | P-Value |
|------|-----------------------------------------------------------------------------------|-------------------------------|----------------------------|--------------------------|---------|
|      |                                                                                   | None/Mild<br>(n=303)<br>(%)   | Moderate<br>(N=703)<br>(%) | Severe<br>(n=200)<br>(%) |         |
| 197  | <i>Bergeyella</i> HMT 907                                                         | 35.6                          | 43.1                       | 39.5                     | 0.082   |
| 94   | <i>Veillonellaceae</i> _[G-1] HMT 155                                             | 77.2                          | 78.7                       | 85.0                     | 0.085   |
| 222  | <i>Atopobium</i> HMT 199                                                          | 32.3                          | 34.1                       | 41.5                     | 0.087   |
| 124  | <i>Actinomyces meyeri</i>                                                         | 63.0                          | 68.1                       | 72.0                     | 0.094   |
| 150  | TM7_[G-1] HMT 348                                                                 | 57.4                          | 59.0                       | 66.5                     | 0.099   |
| 75   | <i>Peptostreptococcaceae</i> _[XI][G-9]<br>[ <i>Eubacterium</i> ] <sub>brac</sub> | 81.2                          | 82.1                       | 88.0                     | 0.100   |
| 103  | <i>Atopobium parvulum</i>                                                         | 73.3                          | 76.2                       | 81.5                     | 0.103   |
| 201  | <i>Prevotella</i> HMT 306                                                         | 38.0                          | 38.7                       | 46.5                     | 0.103   |
| 18   | <i>Corynebacterium matruchotii</i>                                                | 97.7                          | 96.9                       | 99.5                     | 0.106   |
| 40   | <i>Campylobacter showae</i>                                                       | 88.4                          | 91.7                       | 93.5                     | 0.108   |
| 16   | <i>Fusobacterium naviforme</i>                                                    | 98.3                          | 97.9                       | 100.0                    | 0.114   |
| 12   | <i>Streptococcus gordonii</i>                                                     | 98.0                          | 99.4                       | 99.0                     | 0.118   |
| 231  | <i>Porphyromonas</i> HMT 278                                                      | 29.0                          | 30.0                       | 37.0                     | 0.121   |
| 36   | <i>Actinomyces</i> HMT 180                                                        | 93.1                          | 90.9                       | 95.0                     | 0.128   |
| 173  | TM7_[G-3] HMT 351                                                                 | 47.2                          | 52.3                       | 56.0                     | 0.131   |
| 204  | <i>Shuttleworthia satelles</i>                                                    | 35.6                          | 39.0                       | 44.5                     | 0.137   |
| 140  | <i>Aggregatibacter</i> HMT 458                                                    | 58.4                          | 65.0                       | 63.5                     | 0.138   |
| 99   | <i>Selenomonas</i> HMT 919                                                        | 73.9                          | 77.4                       | 81.5                     | 0.138   |
| 87   | <i>Streptococcus parasanguinis</i> _I                                             | 77.2                          | 81.4                       | 84.0                     | 0.139   |
| 154  | <i>Leptotrichia</i> HMT 225                                                       | 52.1                          | 57.5                       | 60.5                     | 0.142   |
| 54   | <i>Streptococcus mutans</i>                                                       | 87.8                          | 87.6                       | 92.5                     | 0.148   |
| 38   | <i>Prevotella melaninogenica</i>                                                  | 91.4                          | 90.8                       | 95.0                     | 0.159   |
| 186  | <i>Capnocytophaga</i> HMT 338                                                     | 42.9                          | 44.1                       | 51.0                     | 0.159   |
| 25   | <i>Rothia mucilaginosa</i>                                                        | 94.7                          | 97.2                       | 96.0                     | 0.161   |
| 236  | <i>Treponema lecithinolyticum</i>                                                 | 25.7                          | 29.9                       | 33.5                     | 0.162   |
| 151  | TM7_[G-1] HMT 488                                                                 | 53.1                          | 58.9                       | 60.5                     | 0.162   |
| 22   | <i>Haemophilus parainfluenzae</i>                                                 | 95.7                          | 97.7                       | 96.0                     | 0.166   |
| 194  | <i>Prevotella veroralis</i>                                                       | 37.6                          | 41.8                       | 46.0                     | 0.168   |
| 178  | <i>Capnocytophaga</i> HMT 864                                                     | 44.9                          | 49.9                       | 53.0                     | 0.168   |
| 30   | TM7_[G-1] HMT 346                                                                 | 94.7                          | 94.2                       | 97.5                     | 0.169   |
| 181  | <i>Leptotrichia</i> HMT 498                                                       | 43.2                          | 48.9                       | 50.5                     | 0.176   |
| 7    | <i>Fusobacterium nucleatum</i> _subsp._ <i>animalis</i>                           | 98.7                          | 99.4                       | 100.0                    | 0.181   |
| 120  | <i>Solobacterium moorei</i>                                                       | 67.3                          | 70.1                       | 75.0                     | 0.183   |
| 193  | <i>Mitsuokella</i> HMT 131                                                        | 37.6                          | 43.2                       | 44.5                     | 0.188   |
| 11   | <i>Selenomonas noxia</i>                                                          | 98.3                          | 99.0                       | 100.0                    | 0.189   |
| 86   | <i>Megasphaera micronuciformis</i>                                                | 78.2                          | 80.9                       | 84.5                     | 0.214   |

| Rank | OTU Label                      | Periodontal Disease Category* |                            |                          | P-Value |
|------|--------------------------------|-------------------------------|----------------------------|--------------------------|---------|
|      |                                | None/Mild<br>(n=303)<br>(%)   | Moderate<br>(N=703)<br>(%) | Severe<br>(n=200)<br>(%) |         |
| 174  | Fusobacterium HMT 370          | 46.9                          | 51.9                       | 54.0                     | 0.220   |
| 21   | Streptococcus salivarius       | 97.7                          | 96.4                       | 98.5                     | 0.242   |
| 123  | Leptotrichia shahii            | 65.7                          | 67.1                       | 72.5                     | 0.250   |
| 187  | Capnocytophaga HMT 902         | 40.6                          | 46.2                       | 44.5                     | 0.256   |
| 58   | Leptotrichia wadei             | 86.1                          | 87.6                       | 91.0                     | 0.257   |
| 51   | Streptococcus HMT 074          | 86.8                          | 90.0                       | 90.5                     | 0.260   |
| 156  | Prevotella pleuritidis         | 53.8                          | 56.0                       | 61.0                     | 0.274   |
| 10   | Campylobacter gracilis         | 98.3                          | 99.3                       | 99.5                     | 0.284   |
| 59   | Streptococcus parasanguinis_II | 85.8                          | 87.5                       | 90.5                     | 0.295   |
| 254  | Prevotella HMT 475             | 15.5                          | 18.9                       | 20.5                     | 0.301   |
| 104  | Capnocytophaga HMT 336         | 72.9                          | 75.0                       | 79.0                     | 0.302   |
| 122  | Parvimonas HMT 393             | 66.0                          | 69.8                       | 72.0                     | 0.313   |
| 73   | Gemella sanguinis              | 81.5                          | 82.8                       | 86.5                     | 0.327   |
| 202  | Veillonella HMT 780            | 37.0                          | 38.8                       | 43.5                     | 0.329   |
| 80   | Selenomonas flueggei           | 80.9                          | 81.4                       | 85.5                     | 0.349   |
| 216  | Alloprevotella HMT 473         | 32.7                          | 37.4                       | 36.0                     | 0.356   |
| 199  | TM7_[G-1] HMT 869              | 39.3                          | 39.7                       | 45.0                     | 0.357   |
| 19   | Actinomyces oris               | 96.4                          | 97.3                       | 98.5                     | 0.357   |
| 29   | Capnocytophaga gingivalis      | 93.7                          | 95.2                       | 96.5                     | 0.363   |
| 224  | TM7_[G-2] HMT 350              | 32.3                          | 34.6                       | 38.5                     | 0.364   |
| 26   | Veillonella atypica            | 96.4                          | 95.9                       | 98.0                     | 0.368   |
| 131  | Prevotella histicola           | 66.3                          | 64.3                       | 69.5                     | 0.377   |
| 90   | Veillonella rogosae            | 77.2                          | 80.7                       | 81.5                     | 0.384   |
| 145  | Lachnoanaerobaculum orale      | 57.4                          | 61.9                       | 62.0                     | 0.385   |
| 72   | Neisseria sicca                | 81.8                          | 83.6                       | 86.5                     | 0.385   |
| 8    | Streptococcus sanguinis        | 99.0                          | 99.3                       | 100.0                    | 0.396   |
| 81   | Selenomonas HMT 892            | 81.8                          | 80.8                       | 85.0                     | 0.397   |
| 27   | Dialister invisus              | 94.1                          | 95.9                       | 96.0                     | 0.411   |
| 116  | Prevotella HMT 472             | 67.7                          | 71.6                       | 72.0                     | 0.415   |
| 214  | Selenomonas HMT 149            | 35.3                          | 35.7                       | 40.5                     | 0.416   |
| 97   | Actinobaculum HMT 183          | 76.9                          | 77.7                       | 81.5                     | 0.431   |
| 128  | Neisseria oralis               | 64.0                          | 66.1                       | 69.5                     | 0.446   |
| 92   | Leptotrichia HMT 417           | 77.2                          | 80.7                       | 79.0                     | 0.457   |
| 100  | Selenomonas HMT 137            | 74.6                          | 78.1                       | 76.0                     | 0.457   |
| 53   | Leptotrichia hongkongensis     | 87.5                          | 88.6                       | 91.0                     | 0.466   |
| 66   | Corynebacterium durum          | 84.2                          | 86.8                       | 84.5                     | 0.477   |
| 88   | Cardiobacterium valvarum       | 78.5                          | 81.7                       | 79.5                     | 0.483   |
| 37   | Eikenella corrodens            | 91.1                          | 92.0                       | 94.0                     | 0.490   |



| Rank | OTU Label                                  | Periodontal Disease Category* |                            |                          | P-Value |
|------|--------------------------------------------|-------------------------------|----------------------------|--------------------------|---------|
|      |                                            | None/Mild<br>(n=303)<br>(%)   | Moderate<br>(N=703)<br>(%) | Severe<br>(n=200)<br>(%) |         |
| 71   | Porphyromonas HMT 279                      | 83.2                          | 84.4                       | 87.0                     | 0.503   |
| 46   | Bacteroidales_[G-2] HMT 274                | 90.1                          | 89.8                       | 92.5                     | 0.508   |
| 13   | Fusobacterium nucleatum_subsp._polymorphum | 98.0                          | 98.9                       | 99.0                     | 0.511   |
| 43   | Selenomonas HMT 136                        | 89.4                          | 90.6                       | 92.5                     | 0.514   |
| 112  | Selenomonas HMT 146                        | 70.6                          | 71.3                       | 75.0                     | 0.519   |
| 137  | Porphyromonas HMT 284                      | 61.1                          | 64.6                       | 63.5                     | 0.567   |
| 158  | Aggregatibacter aphrophilus                | 53.8                          | 56.2                       | 58.5                     | 0.573   |
| 55   | Cardiobacterium hominis                    | 86.8                          | 88.8                       | 89.5                     | 0.582   |
| 57   | Actinomyces gerencseriae                   | 86.5                          | 88.1                       | 89.5                     | 0.583   |
| 249  | Aggregatibacter HMT 513                    | 18.2                          | 20.6                       | 21.5                     | 0.583   |
| 42   | Capnocytophaga granulosa                   | 91.1                          | 90.2                       | 92.5                     | 0.594   |
| 260  | GN02_[G-2] HMT 873                         | 12.2                          | 14.2                       | 15.0                     | 0.611   |
| 146  | Veillonella denticariosi                   | 58.4                          | 61.5                       | 59.0                     | 0.613   |
| 176  | Prevotella HMT 313                         | 49.5                          | 49.9                       | 53.5                     | 0.629   |
| 113  | Leptotrichia HMT 392                       | 69.3                          | 71.7                       | 73.0                     | 0.630   |
| 172  | Aggregatibacter segnis                     | 50.2                          | 52.9                       | 53.5                     | 0.678   |
| 175  | Prevotella loescheii                       | 48.5                          | 51.1                       | 52.0                     | 0.689   |
| 138  | Alloprevotella HMT 308                     | 61.4                          | 64.2                       | 64.0                     | 0.693   |
| 83   | Lachnoanaerobaculum saburreum              | 79.9                          | 81.9                       | 81.0                     | 0.739   |
| 20   | Prevotella oris                            | 97.4                          | 97.0                       | 98.0                     | 0.747   |
| 240  | Leptotrichia HMT 879                       | 24.1                          | 25.3                       | 27.0                     | 0.763   |
| 48   | Gemella morbillorum                        | 90.4                          | 89.5                       | 91.0                     | 0.780   |
| 33   | Bergeyella HMT 322                         | 92.7                          | 92.6                       | 94.0                     | 0.791   |
| 207  | Scardovia wiggsiae                         | 37.6                          | 38.3                       | 40.5                     | 0.798   |
| 165  | Porphyromonas catoniae                     | 53.1                          | 55.2                       | 53.5                     | 0.803   |
| 101  | Kingella denitrificans                     | 75.6                          | 76.5                       | 78.0                     | 0.821   |
| 245  | Capnocytophaga HMT 380                     | 21.1                          | 22.8                       | 23.0                     | 0.828   |
| 32   | Kingella oralis                            | 93.4                          | 92.9                       | 94.0                     | 0.848   |
| 206  | Neisseria subflava                         | 38.6                          | 38.4                       | 40.5                     | 0.863   |
| 182  | Granulicatella elegans                     | 46.9                          | 46.9                       | 49.0                     | 0.865   |
| 134  | Capnocytophaga HMT 326                     | 64.7                          | 65.4                       | 67.0                     | 0.865   |
| 111  | Leptotrichia HMT 215                       | 71.0                          | 71.7                       | 73.0                     | 0.883   |
| 219  | Neisseria bacilliformis                    | 35.0                          | 35.4                       | 37.0                     | 0.891   |
| 93   | Streptococcus anginosus                    | 79.9                          | 79.1                       | 80.5                     | 0.896   |
| 77   | Neisseria elongata                         | 81.8                          | 82.8                       | 82.0                     | 0.924   |
| 227  | Capnocytophaga HMT 903                     | 32.7                          | 32.6                       | 34.0                     | 0.929   |
| 264  | Sphingomonas HMT 006                       | 6.9                           | 7.1                        | 7.5                      | 0.971   |

| Rank | OTU Label                                | Periodontal Disease Category* |                            |                          | P-Value |
|------|------------------------------------------|-------------------------------|----------------------------|--------------------------|---------|
|      |                                          | None/Mild<br>(n=303)<br>(%)   | Moderate<br>(N=703)<br>(%) | Severe<br>(n=200)<br>(%) |         |
| 45   | Capnocytophaga leadbetteri               | 90.1                          | 90.5                       | 90.5                     | 0.982   |
| 119  | Abiotrophia defectiva                    | 70.0                          | 70.6                       | 70.5                     | 0.982   |
| 74   | Neisseria flavescens                     | 82.8                          | 83.1                       | 83.0                     | 0.996   |
| 229  | Leptotrichia goodfellowii                | 35.3                          | 33.4                       | 24.0                     | 0.019   |
| 162  | Pseudomonas fluorescens                  | 62.0                          | 53.3                       | 52.5                     | 0.026   |
| 96   | Lautropia mirabilis                      | 83.2                          | 77.4                       | 73.5                     | 0.027   |
| 115  | Streptococcus HMT 056                    | 68.0                          | 73.7                       | 65.5                     | 0.035   |
| 102  | Streptococcus lactarius                  | 75.2                          | 78.5                       | 71.5                     | 0.098   |
| 164  | Haemophilus HMT 036                      | 58.7                          | 54.8                       | 49.5                     | 0.124   |
| 50   | Rothia aeria                             | 90.1                          | 90.0                       | 85.5                     | 0.163   |
| 24   | Streptococcus intermedius                | 98.0                          | 96.9                       | 95.0                     | 0.165   |
| 61   | Actinomyces HMT 171                      | 86.1                          | 88.6                       | 84.5                     | 0.236   |
| 14   | Streptococcus cristatus                  | 98.0                          | 99.0                       | 98.0                     | 0.354   |
| 265  | Porphyrobacter tepidarius                | 7.6                           | 7.1                        | 4.5                      | 0.354   |
| 198  | Aggregatibacter paraphrophilus           | 42.6                          | 40.8                       | 36.5                     | 0.387   |
| 41   | Actinomyces johnsonii                    | 90.1                          | 92.0                       | 89.5                     | 0.413   |
| 44   | Actinomyces massiliensis                 | 89.1                          | 91.3                       | 89.0                     | 0.423   |
| 62   | Capnocytophaga sputigena                 | 87.8                          | 87.9                       | 84.5                     | 0.424   |
| 5    | Fusobacterium nucleatum_subsp._vincentii | 100.0                         | 99.4                       | 99.5                     | 0.427   |
| 47   | Selenomonas artemidis                    | 90.4                          | 90.9                       | 88.0                     | 0.473   |
| 148  | Sphingomonas echinoides                  | 62.7                          | 59.3                       | 58.0                     | 0.498   |
| 220  | Capnocytophaga HMT 324                   | 38.0                          | 34.4                       | 34.0                     | 0.517   |
| 6    | Granulicatella adiacens                  | 99.7                          | 99.6                       | 99.0                     | 0.532   |
| 213  | SR1_[G-1] HMT 874                        | 38.9                          | 35.3                       | 37.0                     | 0.534   |
| 179  | Ottowia HMT 894                          | 51.2                          | 47.5                       | 49.0                     | 0.567   |
| 252  | Mitsuokella HMT 521                      | 20.1                          | 18.5                       | 16.5                     | 0.589   |
| 250  | Lactobacillus gasseri                    | 19.8                          | 20.8                       | 17.5                     | 0.592   |
| 15   | Fusobacterium HMT 203                    | 99.0                          | 98.2                       | 98.5                     | 0.602   |
| 17   | Actinomyces naeslundii                   | 98.7                          | 97.7                       | 98.0                     | 0.609   |
| 70   | Leptotrichia HMT 212                     | 84.2                          | 85.6                       | 83.0                     | 0.613   |
| 4    | Selenomonas sputigena                    | 99.7                          | 99.9                       | 99.5                     | 0.634   |
| 215  | Porphyromonas HMT 275                    | 38.3                          | 35.3                       | 35.5                     | 0.649   |
| 235  | Haemophilus parahaemolyticus             | 31.0                          | 30.4                       | 27.5                     | 0.669   |
| 133  | TM7_[G-1] HMT 352                        | 67.3                          | 65.4                       | 63.5                     | 0.670   |
| 208  | Leptotrichia HMT 223                     | 39.6                          | 37.0                       | 39.0                     | 0.696   |
| 161  | Actinomyces HMT 170                      | 56.4                          | 55.6                       | 53.0                     | 0.737   |
| 262  | Leptothrix HMT 025                       | 11.9                          | 10.4                       | 11.5                     | 0.755   |

| Rank | OTU Label                          | Periodontal Disease Category* |                            |                          | P-Value |
|------|------------------------------------|-------------------------------|----------------------------|--------------------------|---------|
|      |                                    | None/Mild<br>(n=303)<br>(%)   | Moderate<br>(N=703)<br>(%) | Severe<br>(n=200)<br>(%) |         |
| 241  | <i>Brevundimonas diminuta</i>      | 26.4                          | 25.0                       | 23.5                     | 0.761   |
| 171  | <i>Leptotrichia</i> HMT 219        | 54.1                          | 51.9                       | 53.5                     | 0.791   |
| 243  | <i>Bradyrhizobium elkanii</i>      | 26.1                          | 24.8                       | 23.5                     | 0.802   |
| 191  | TM7_[G-6] HMT 870                  | 41.9                          | 43.1                       | 41.0                     | 0.848   |
| 28   | <i>Campylobacter concisus</i>      | 95.0                          | 95.4                       | 94.5                     | 0.851   |
| 35   | <i>Actinomyces</i> HMT 169         | 92.7                          | 92.3                       | 91.5                     | 0.877   |
| 239  | <i>Neisseria pharyngis</i>         | 27.1                          | 25.7                       | 26.0                     | 0.909   |
| 263  | <i>Atopobium</i> HMT 416           | 8.6                           | 9.0                        | 8.0                      | 0.910   |
| 170  | TM7_[G-1] HMT 347                  | 52.8                          | 53.9                       | 52.5                     | 0.913   |
| 98   | <i>Fusobacterium periodonticum</i> | 78.5                          | 77.4                       | 77.5                     | 0.918   |
| 180  | <i>Microbacterium flavescens</i>   | 47.9                          | 48.2                       | 47.0                     | 0.954   |
| 192  | <i>Haemophilus haemolyticus</i>    | 42.6                          | 41.7                       | 42.5                     | 0.956   |
| 34   | <i>Gemella haemolysans</i>         | 92.4                          | 92.6                       | 92.0                     | 0.960   |
| 1    | <i>Streptococcus oralis</i>        | 100.0                         | 100.0                      | 100.0                    | -       |
| 2    | <i>Veillonella dispar</i>          | 100.0                         | 100.0                      | 100.0                    | -       |
| 3    | <i>Veillonella parvula</i>         | 100.0                         | 100.0                      | 100.0                    | -       |

\*Periodontal disease presence and severity defined by CDC/AAP criteria (Eke et al., 2012).

†P-value is uncorrected. Grey shading indicates those that remain statistically significant after Bonferroni correction.
